# Supplementary material for: Divergent functions of hematopoietic transcription factors in lineage priming and differentiation during erythro-megakaryopoiesis
Source: PubMed Central journal article supplement (PMC4248311; doi:10.1101/gr.164178.113), 2014-12
Supplement: supp_gr.164178.113_Supplemental_Figures.pdf [file supp_gr.164178.113_Supplemental_Figures.pdf]

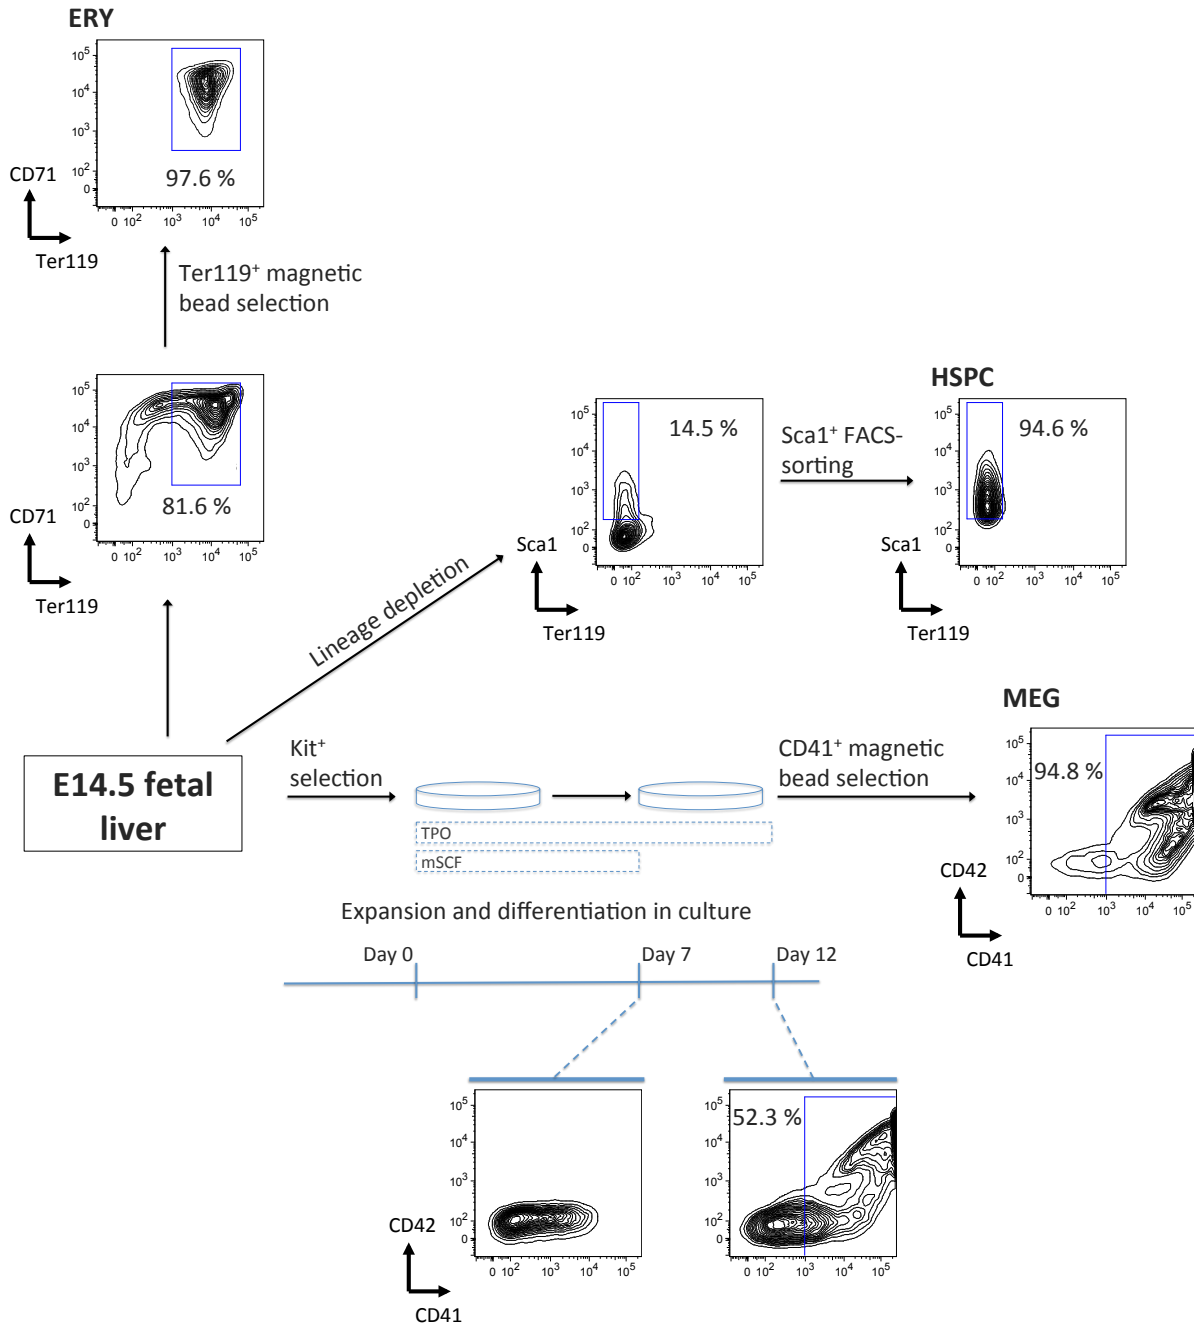

**Supplemental Figure 1. Methods for purifying erythroblasts (ERY), megakaryocytes (MEG) and hematopoietic stem/progenitor cells (HSPCs).** Flow cytometry density plots of intermediate and final cell populations are shown, stained with anti-cell surface marker antibodies as indicated.

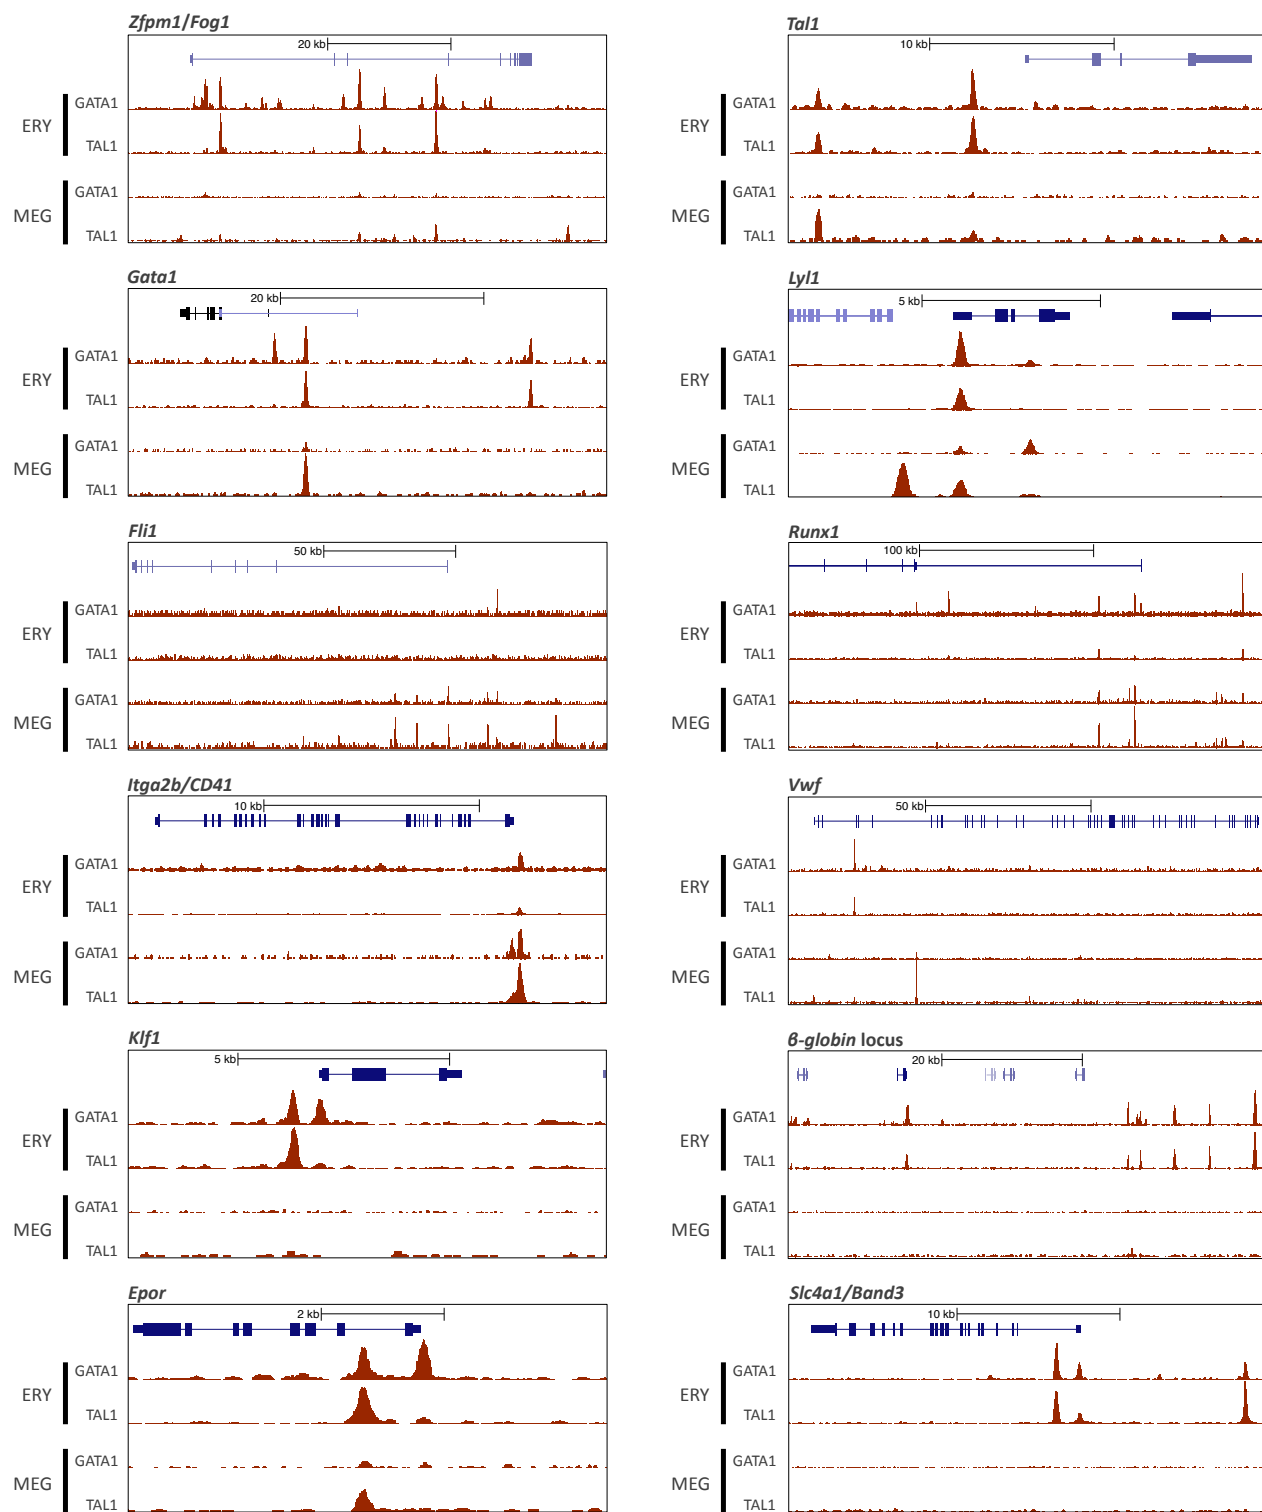

**Supplemental Figure 2. Examples of genes with lineage-specific patterns of chromatin occupancy.** Occupancy of GATA1 and TAL1 in ERY and MEG, as determined by ChIP-seq, are shown below a schematic of each gene.

A

|     |       | ERY   |      | MEG   |       |      |      |
|-----|-------|-------|------|-------|-------|------|------|
|     |       | GATA1 | TAL1 | GATA1 | GATA2 | TAL1 | FLI1 |
| ERY | GATA1 | -     | 2711 | 433   | -     | -    | -    |
|     | TAL1  | 2711  | -    | -     | -     | 242  | -    |
| MEG | GATA1 | 433   | -    | -     | 455   | 757  | 316  |
|     | GATA2 | -     | -    | 455   | -     | 342  | 197  |
|     | TAL1  | -     | 242  | 757   | 342   | -    | 375  |
|     | FLI1  | -     | -    | 316   | 197   | 375  | -    |

B

|     |       | Total # of peaks | % peaks in genes | Genes with at least 1 peak | Expressed genes with at least 1 peak |
|-----|-------|------------------|------------------|----------------------------|--------------------------------------|
| ERY | GATA1 | 5767             | 77%              | 5116                       | 2411                                 |
|     | TAL1  | 3086             | 75%              | 2848                       | 1352                                 |
| MEG | GATA1 | 1727             | 66%              | 1633                       | 765                                  |
|     | GATA2 | 2728             | 63%              | 2304                       | 863                                  |
|     | TAL1  | 3505             | 62%              | 2840                       | 1149                                 |
|     | FLI1  | 2001             | 84%              | 3013                       | 1542                                 |

**Supplemental Figure 3. Characterization of genome-wide transcription factor occupancy.** *A*, Intersection of transcription factor binding peaks within and between lineages. *B*, Numbers and distribution of transcription factor binding peaks across the genome.

# ERY

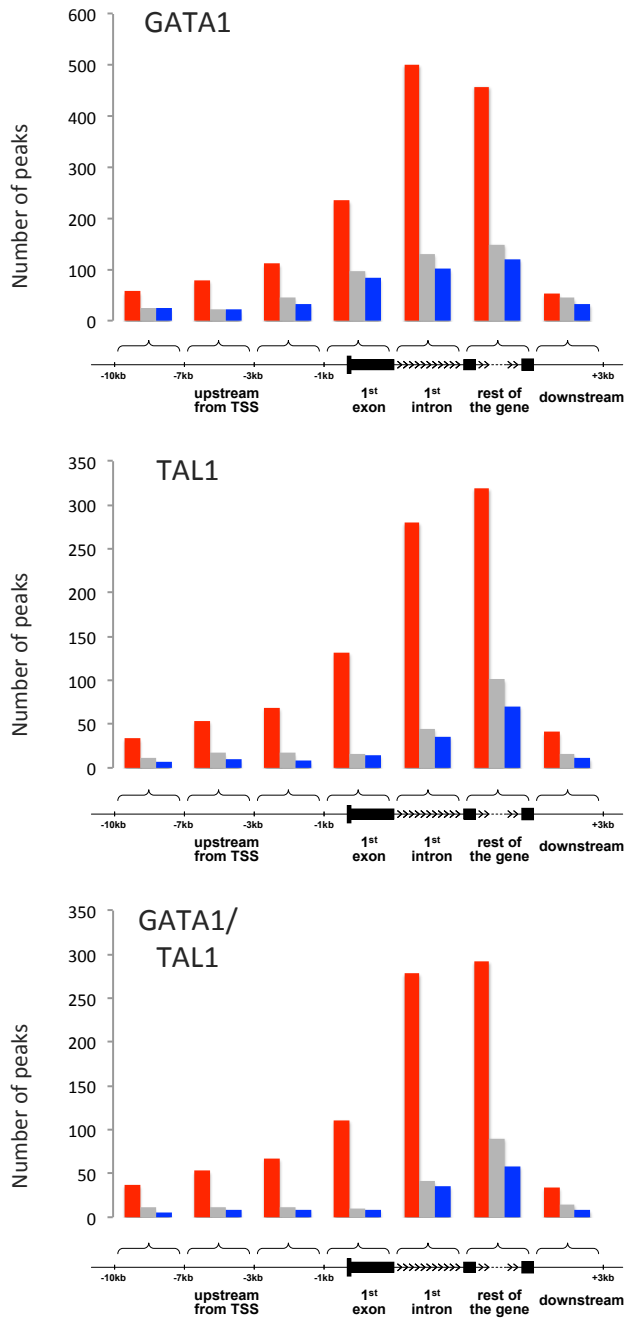

**Supplemental Figure 4. Distribution of transcription factor OSs across gene structure and its correlation with the developmental gene expression response in ERY.** Distribution of GATA1 and TAL1 OSs across the gene structure, shown as the absolute number of peaks called in a given gene segment, in up-regulated (red), down-regulated (blue) and non-responsive (grey) gene categories. Exons are indicated by black rectangles. Introns are represented by thin lines with arrows marking the direction of transcription.

# MEG

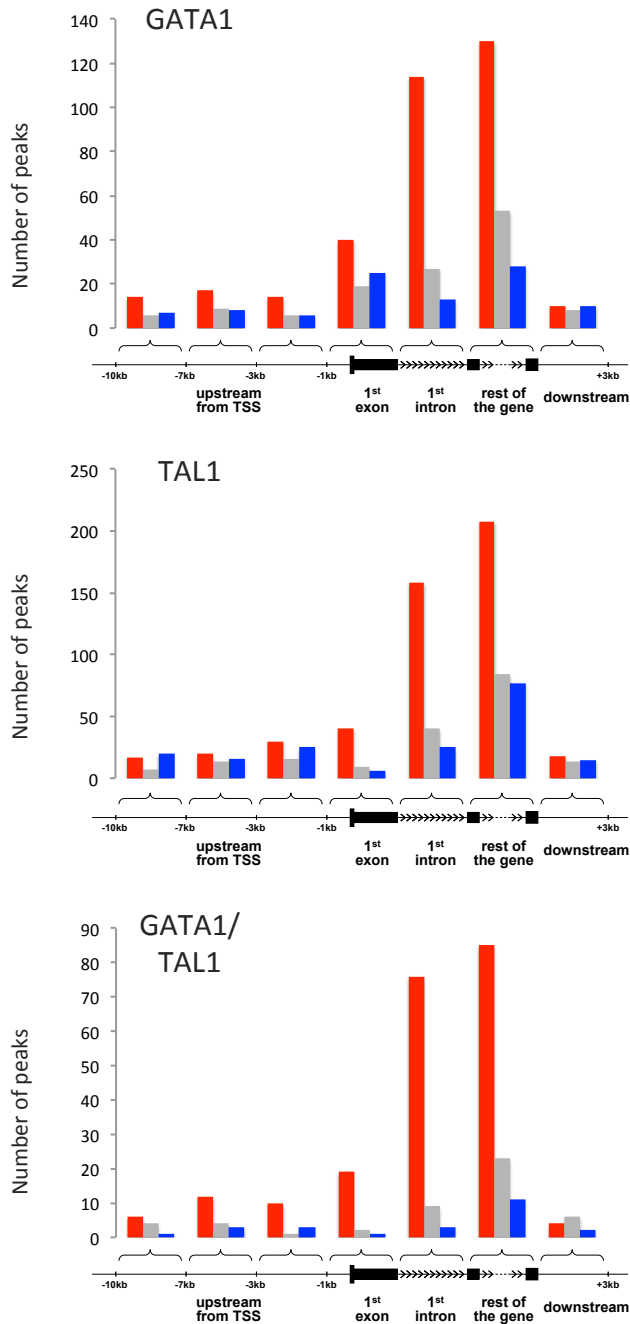

**Supplemental Figure 5. Distribution of transcription factor OSs across gene structure and its correlation with the developmental gene expression response in MEG.** Distribution of GATA1 and TAL1 occupancy across the gene structure, shown as the absolute number of peaks called in a given gene segment, in up-regulated (red), down-regulated (blue) and non-responsive (grey) gene categories. Introns are represented by thin lines with arrows marking the direction of transcription.

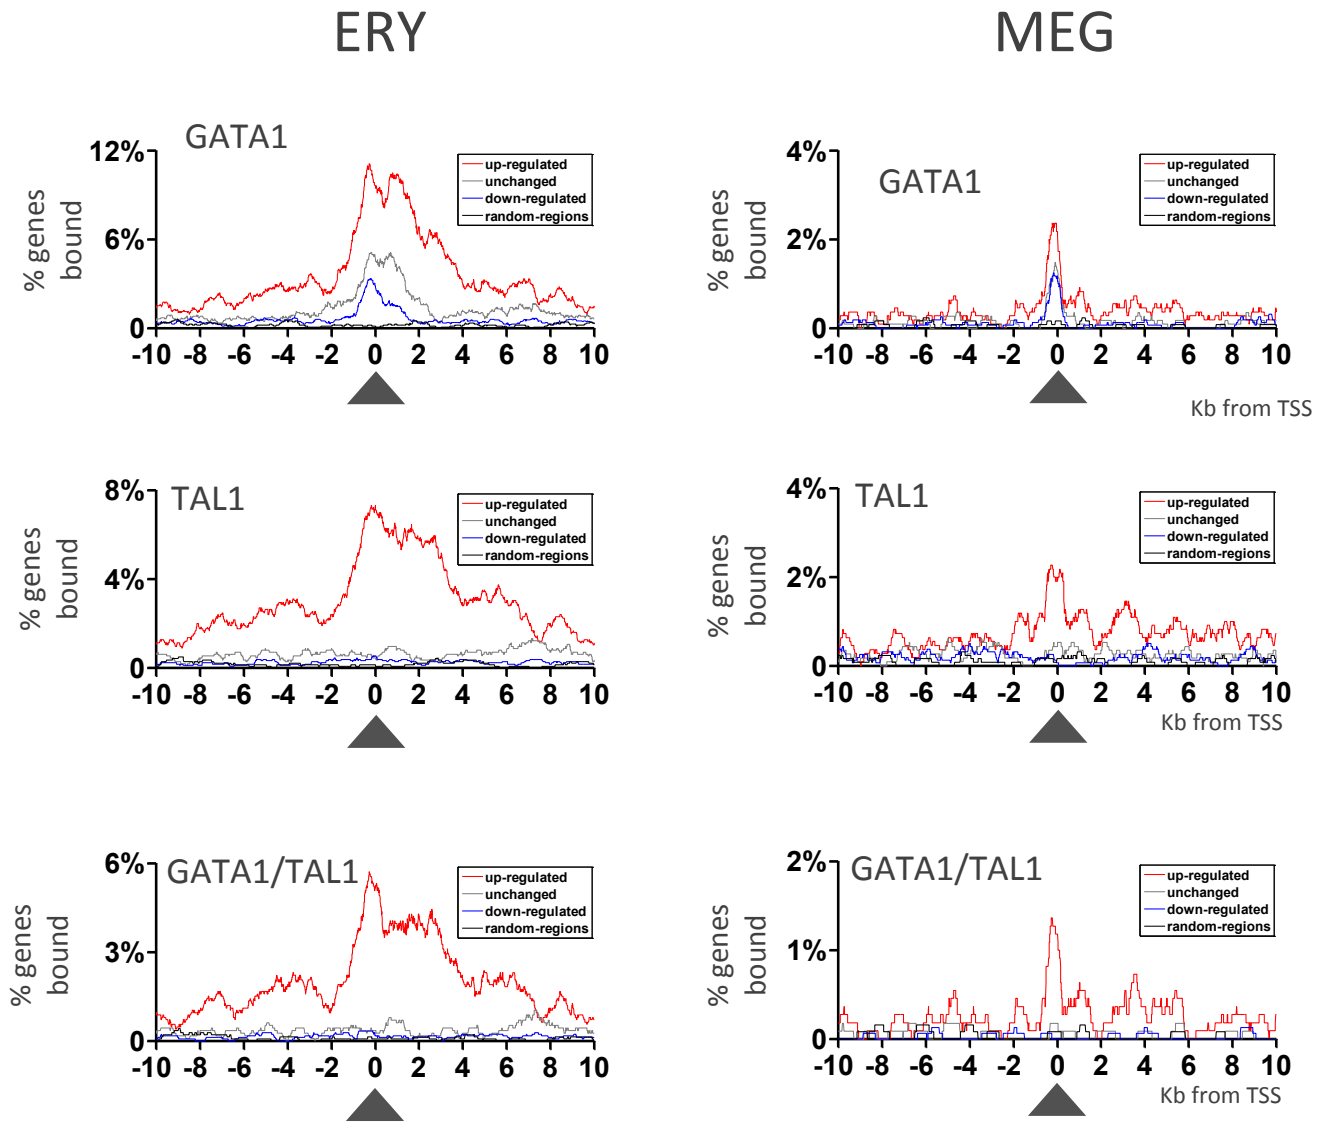

**Supplemental Figure 6. Distribution of GATA1 and TAL1 OSs relative to TSS (indicated by black arrows) in up-regulated (red), down-regulated (blue) and non-responsive (grey) genes. Horizontal axis, Kb upstream or downstream from TSS (arrow). Vertical axis, % genes in a given response category with at least one transcription factor binding peak.**

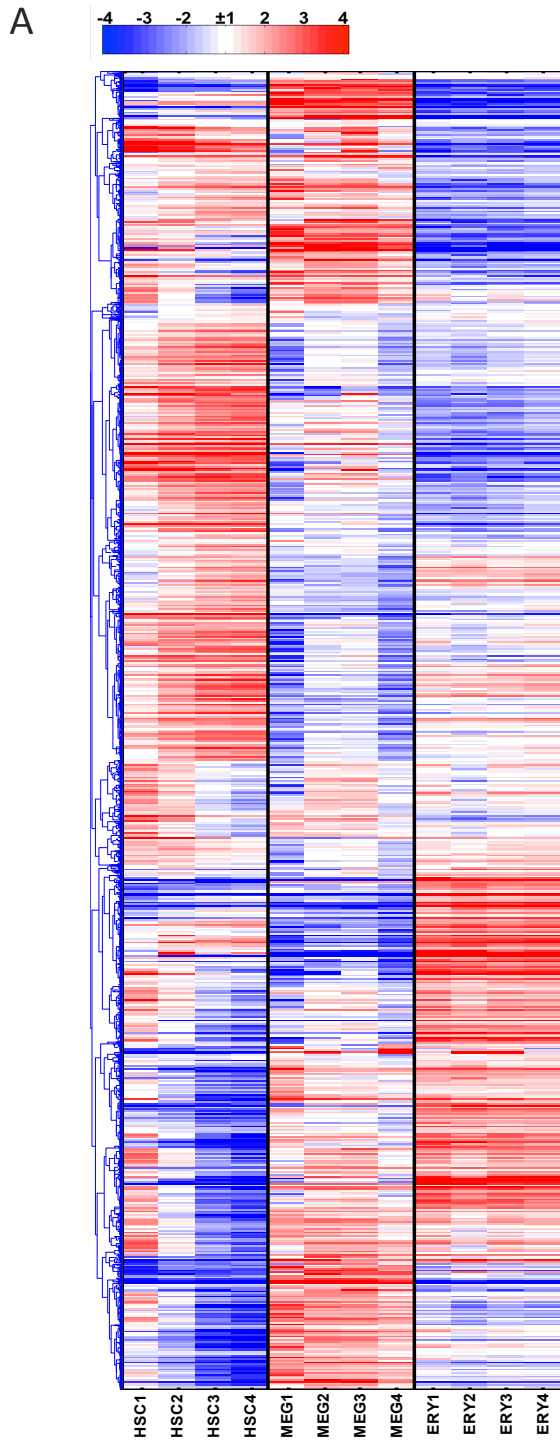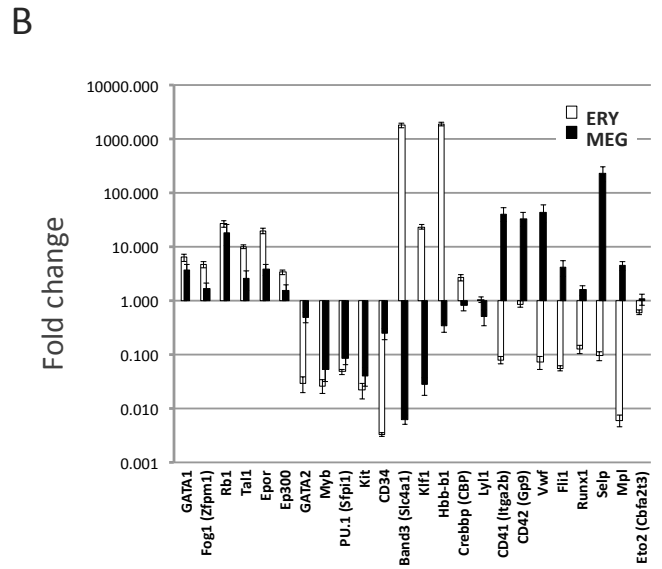

**Supplemental Figure 7. Messenger RNA expression during erythro-megakaryopoiesis.** *A*, Global hierarchical clustering of the 7513 expressed genes in four biological replicates based on Spearman correlation distance. *B*, Developmental changes in mRNA expression in ERY and MEG relative to HSPCs defined by TaqMan PCR for selected genes.

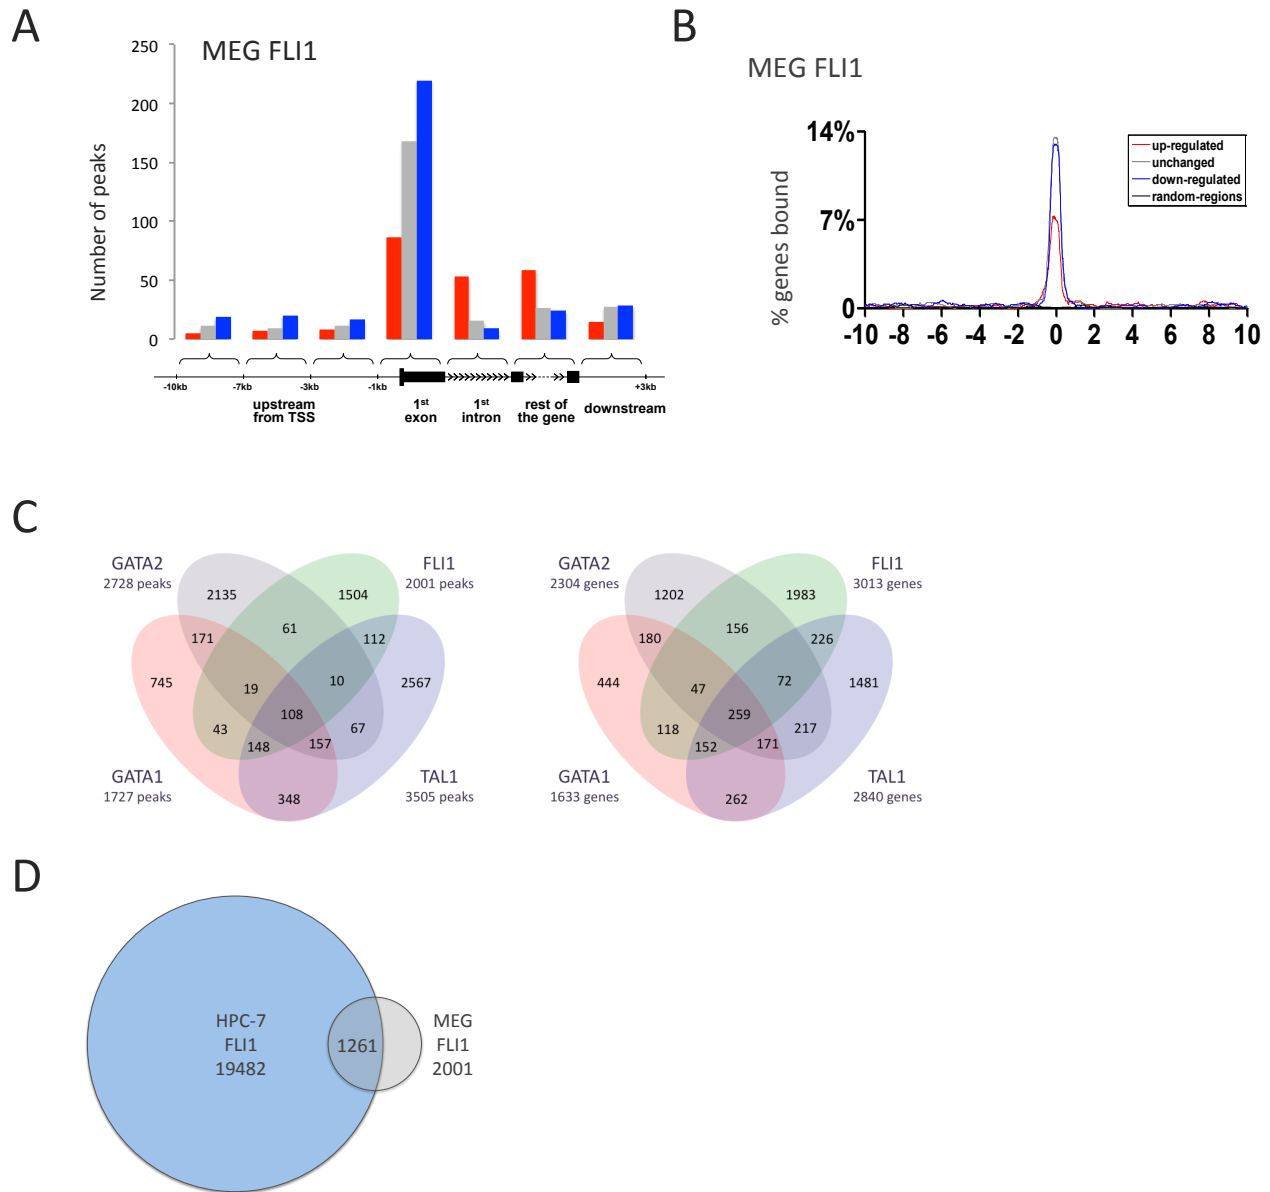

**Supplemental Figure 8. FLI1 occupancy in MEG.** *A*, Distribution of FLI1 OSs across the gene structure, shown as the absolute number of peaks called in a given gene segment, in up-regulated (red), down-regulated (blue) and non-responsive (grey) gene categories. Introns are represented by thin lines with arrows marking the direction of transcription. *B*, Distribution of FLI1 OSs relative to TSS (indicated by black arrows) in up-regulated, down-regulated and non-responsive gene categories. *Horizontal axis*, Kb from upstream or downstream from TSS (arrow). *Vertical axis*, % genes in a given response category with at least one transcription factor binding peak. *C*, A comprehensive intersection of GATA1, GATA2, TAL1 and FLI1 occupancy in MEG, for specific occupancy peaks (left) and genes (right). *D*, Intersection of FLI1 binding peaks in MEG versus HPC-7 cells (Wilson et al., 2010).



% MEG/ERY transcription factor  
peaks overlapping with HPC-7 peaks

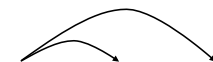

| HPC7     | MEG        | ERY        | N HPC7 | N MEG/ERY | N overlapping | % overlap |
|----------|------------|------------|--------|-----------|---------------|-----------|
| ERG      |            | GATA1/TAL1 | 35120  | 2711      | 661           | 24.4%     |
| ERG      |            | GATA1      | 35120  | 5767      | 1596          | 27.7%     |
| ERG      |            | TAL1       | 35120  | 3086      | 812           | 26.3%     |
| ERG      | GATA1/TAL1 |            | 35120  | 757       | 559           | 73.8%     |
| ERG      | GATA1      |            | 35120  | 1727      | 954           | 55.2%     |
| ERG      | TAL1       |            | 35120  | 3505      | 1214          | 34.6%     |
| ERG      | FLI1       |            | 35120  | 2001      | 1776          | 88.8%     |
| ERG      | GATA2      |            | 35120  | 2728      | 820           | 30.1%     |
| Fli1     |            | GATA1/TAL1 | 19482  | 2711      | 445           | 16.4%     |
| Fli1     |            | GATA1      | 19482  | 5767      | 863           | 15.0%     |
| Fli1     |            | TAL1       | 19482  | 3086      | 520           | 16.9%     |
| Fli1     | GATA1/TAL1 |            | 19482  | 757       | 565           | 74.6%     |
| Fli1     | GATA1      |            | 19482  | 1727      | 888           | 51.4%     |
| Fli1     | TAL1       |            | 19482  | 3505      | 1122          | 32.0%     |
| Fli1     | FLI1       |            | 19482  | 2001      | 1283          | 64.1%     |
| Fli1     | GATA2      |            | 19482  | 2728      | 760           | 27.9%     |
| Gata2    |            | GATA1/TAL1 | 9120   | 2711      | 450           | 16.6%     |
| Gata2    |            | GATA1      | 9120   | 5767      | 895           | 15.5%     |
| Gata2    |            | TAL1       | 9120   | 3086      | 493           | 16.0%     |
| Gata2    | GATA1/TAL1 |            | 9120   | 757       | 420           | 55.5%     |
| Gata2    | GATA1      |            | 9120   | 1727      | 684           | 39.6%     |
| Gata2    | TAL1       |            | 9120   | 3505      | 669           | 19.1%     |
| Gata2    | FLI1       |            | 9120   | 2001      | 273           | 13.6%     |
| Gata2    | GATA2      |            | 9120   | 2728      | 732           | 26.8%     |
| Lmo2     |            | GATA1/TAL1 | 9518   | 2711      | 706           | 26.0%     |
| Lmo2     |            | GATA1      | 9518   | 5767      | 899           | 15.6%     |
| Lmo2     |            | TAL1       | 9518   | 3086      | 781           | 25.3%     |
| Lmo2     | GATA1/TAL1 |            | 9518   | 757       | 583           | 77.0%     |
| Lmo2     | GATA1      |            | 9518   | 1727      | 805           | 46.6%     |
| Lmo2     | TAL1       |            | 9518   | 3505      | 1144          | 32.6%     |
| Lmo2     | FLI1       |            | 9518   | 2001      | 432           | 21.6%     |
| Lmo2     | GATA2      |            | 9518   | 2728      | 685           | 25.1%     |
| Lyl1     |            | GATA1/TAL1 | 4326   | 2711      | 312           | 11.5%     |
| Lyl1     |            | GATA1      | 4326   | 5767      | 395           | 6.8%      |
| Lyl1     |            | TAL1       | 4326   | 3086      | 339           | 11.0%     |
| Lyl1     | GATA1/TAL1 |            | 4326   | 757       | 383           | 50.6%     |
| Lyl1     | GATA1      |            | 4326   | 1727      | 487           | 28.2%     |
| Lyl1     | TAL1       |            | 4326   | 3505      | 663           | 18.9%     |
| Lyl1     | FLI1       |            | 4326   | 2001      | 254           | 12.7%     |
| Lyl1     | GATA2      |            | 4326   | 2728      | 456           | 16.7%     |
| PU1      |            | GATA1/TAL1 | 21664  | 2711      | 226           | 8.3%      |
| PU1      |            | GATA1      | 21664  | 5767      | 673           | 11.7%     |
| PU1      |            | TAL1       | 21664  | 3086      | 297           | 9.6%      |
| PU1      | GATA1/TAL1 |            | 21664  | 757       | 185           | 24.4%     |
| PU1      | GATA1      |            | 21664  | 1727      | 423           | 24.5%     |
| PU1      | TAL1       |            | 21664  | 3505      | 438           | 12.5%     |
| PU1      | FLI1       |            | 21664  | 2001      | 1080          | 54.0%     |
| PU1      | GATA2      |            | 21664  | 2728      | 629           | 23.1%     |
| Runx1    |            | GATA1/TAL1 | 5202   | 2711      | 344           | 12.7%     |
| Runx1    |            | GATA1      | 5202   | 5767      | 473           | 8.2%      |
| Runx1    |            | TAL1       | 5202   | 3086      | 384           | 12.4%     |
| Runx1    | GATA1/TAL1 |            | 5202   | 757       | 414           | 54.7%     |
| Runx1    | GATA1      |            | 5202   | 1727      | 560           | 32.4%     |
| Runx1    | TAL1       |            | 5202   | 3505      | 740           | 21.1%     |
| Runx1    | FLI1       |            | 5202   | 2001      | 402           | 20.1%     |
| Runx1    | GATA2      |            | 5202   | 2728      | 462           | 16.9%     |
| SCL/TAL1 |            | GATA1/TAL1 | 7083   | 2711      | 529           | 19.5%     |
| SCL/TAL1 |            | GATA1      | 7083   | 5767      | 818           | 14.2%     |
| SCL/TAL1 |            | TAL1       | 7083   | 3086      | 590           | 19.1%     |
| SCL/TAL1 | GATA1/TAL1 |            | 7083   | 757       | 499           | 65.9%     |
| SCL/TAL1 | GATA1      |            | 7083   | 1727      | 657           | 38.0%     |
| SCL/TAL1 | TAL1       |            | 7083   | 3505      | 976           | 27.8%     |
| SCL/TAL1 | FLI1       |            | 7083   | 2001      | 773           | 38.6%     |
| SCL/TAL1 | GATA2      |            | 7083   | 2728      | 492           | 18.0%     |

**Supplemental Figure 9. Intersection of HPC-7 transcription factor OSs with MEG and ERY.** Absolute numbers of overlapping peaks (“*N overlapping*”), as well as fraction of MEG/ERY peaks (“*% overlap*”) that overlap with HPC-7 peaks, are shown. Fractions of overlapping peaks are color-coded according to percent overlap (darker shading corresponds to greater overlap). For example, as seen in row 5, 73.8 % of MEG GATA1/TAL1 co-occupant OSs overlap with (i.e. occupy the same enhancers) as ERG in HPC-7 cells.

A

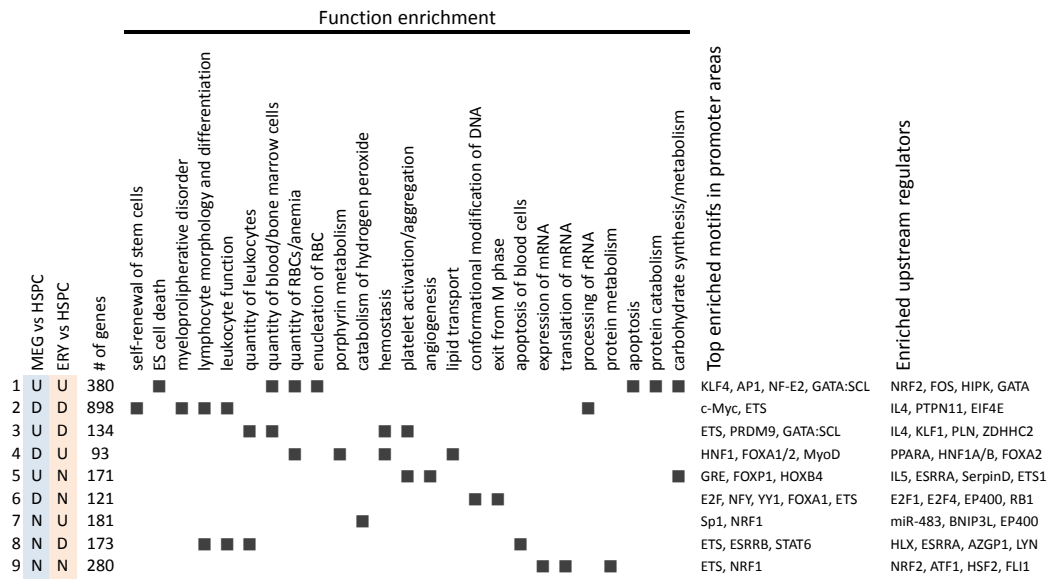

B

|                                 | Motif            | p-value   |
|---------------------------------|------------------|-----------|
| <b>Concordant (Group 1, UU)</b> |                  |           |
| GATA1 OSs                       | n-MYC (HLH)      | 1.00E-04  |
|                                 | FOXA2            | 1.00E-04  |
|                                 | c-MYC (HLH)      | 1.00E-03  |
| GATA1 OSs, ⊖FLI1                | MAFK             | 1.00E-05  |
|                                 | n-MYC (HLH)      | 1.00E-04  |
|                                 | c-MYC (HLH)      | 1.00E-03  |
|                                 | FOXA2            | 1.00E-03  |
| <b>Discordant (Group 3, UD)</b> |                  |           |
| GATA1 OSs                       | ERG (ETS)        | 1.00E-10  |
|                                 | ELK1 (ETS)       | 1.00E-09  |
|                                 | ETV1 (ETS)       | 1.00E-06  |
|                                 | ETS1 (ETS)       | 1.00E-05  |
|                                 | FLI1 (ETS)       | 1.00E-05  |
|                                 | PRDM1            | 1.00E-04  |
|                                 | GATA1 OSs, ⊖FLI1 | ERG (ETS) |
| MyoG (HLH)                      |                  | 1.00E-05  |
| ELK1 (ETS)                      |                  | 1.00E-04  |
| ETV1 (ETS)                      |                  | 1.00E-04  |
| TCF12 (HLH)                     |                  | 1.00E-04  |
| ETS1 (ETS)                      | 1.00E-04         |           |

**Supplemental Figure 10. Analysis of genes according to their developmental expression patterns.** A, Ingenuity Pathway Analysis (IPA) showing predicted functions for genes within each cluster. Also shown are predictions for enriched transcription factor binding motifs (against random background) within "promoter areas", defined as -2000 to +500 bp around the TSS, and upstream regulators. Clustering of genes is based on the combined directionality of developmental expression changes in MEG *versus* ERY with HSPCs as a reference starting point. "U", up-regulated. "D", down-regulated. "N", no change. See also Fig. 3 in the main text. B, Motifs enriched in the 200-bp sequence centered on the transcription factor peaks at the GATA1 OSs in gene cluster 1 (up-regulated in MEG and ERY) versus cluster 3 (up-regulated in MEG, down-regulated in ERY) with GATA1 OSs of the alternate cluster used reciprocally as background.

| MEG                  |            |      | All MEG-regulated genes |      |      |      |     |      |      |     |      |      |      |     |     |      |
|----------------------|------------|------|-------------------------|------|------|------|-----|------|------|-----|------|------|------|-----|-----|------|
|                      |            |      | Non-primed              |      |      |      |     |      |      |     |      |      |      |     |     |      |
| No of occupied genes |            |      | U                       | D    | N    | U    | U   | 1    | 2    | 3   | 4    | 5    | 6    | 7   | 8   | 9    |
| MEG ERY              |            |      | -                       | -    | -    | -    | -   | U    | D    | U   | D    | U    | D    | U   | D   | N    |
| HPC7                 | MEG        | 7513 | 1103                    | 1615 | 1154 | 166  | 203 | 380  | 898  | 134 | 93   | 171  | 121  | 181 | 173 | 280  |
| ERG                  |            | 6817 | -1.1                    |      |      | -1.5 |     | -1.1 |      |     |      | -1.4 | -1.1 |     |     |      |
| Fli1                 |            | 4211 | 1.1                     |      |      |      | 1.3 |      |      | 1.6 |      | -1.5 |      |     | 1.4 |      |
| Gata2                |            | 1770 | 1.5                     |      |      |      | 1.8 |      |      | 2.7 |      | 1.6  |      |     |     |      |
| Lmo2                 |            | 1964 | 1.6                     |      |      | 1.6  | 1.9 | 1.3  |      | 2.7 |      | 1.5  |      |     | 1.5 | -1.8 |
| Lyl1                 |            | 938  | 1.9                     | -1.3 |      | 1.8  | 2.2 | 1.5  |      | 4.1 |      | 1.8  |      |     | 2.2 |      |
| PU1                  |            | 5343 |                         |      |      | -1.6 | 1.1 |      |      | 1.2 | -1.3 |      |      |     | 1.2 |      |
| Runx1                |            | 1410 | 1.5                     |      |      |      | 2.1 |      |      | 3.3 |      |      |      |     |     |      |
| SCL                  |            | 3082 |                         |      |      |      | 1.6 |      |      | 1.7 |      |      |      |     | 1.3 |      |
|                      | GATA1/TAL1 | 387  | 3.2                     | -4.2 |      |      | 4.9 | 2.2  | -4.2 | 7.5 |      | 2.8  |      |     |     |      |
|                      | GATA1      | 765  | 2.4                     | -1.8 |      |      | 3.1 | 1.8  | -1.9 | 4.6 |      | 2.4  |      |     |     |      |
|                      | TAL1       | 1149 | 2.1                     | -1.5 |      | 1.7  | 2.9 | 1.6  | -1.4 | 3.9 |      | 2.1  |      |     |     |      |
|                      | FLI1       | 1542 |                         |      |      |      |     |      | -1.3 | 1.7 |      |      |      |     |     |      |
|                      | GATA2      | 863  | 1.5                     |      |      |      | 2.0 |      |      | 2.7 |      |      |      |     |     |      |
| ERG                  | GATA1/TAL1 | 286  | 3.1                     | -3.8 |      |      | 5.3 | 2.2  | -3.8 | 8.0 |      |      |      |     |     |      |
| ERG                  | GATA1      | 521  | 2.3                     | -1.8 |      |      | 3.5 |      | -1.8 | 5.3 |      | 2.5  |      |     |     |      |
| ERG                  | TAL1       | 514  | 2.7                     | -2.2 |      | 2.2  | 4.2 |      | -2.1 | 5.9 |      | 2.3  |      |     | 2.3 |      |
| ERG                  | FLI1       | 1462 |                         |      |      |      |     |      |      | 1.6 | -3.0 |      |      |     |     |      |
| ERG                  | GATA2      | 449  | 1.7                     |      |      |      | 3.0 |      |      | 3.7 |      |      |      |     |     |      |
| Fli1                 | GATA1/TAL1 | 299  | 3.2                     | -3.8 |      |      | 4.7 | 2.0  | -3.6 | 8.4 |      | 2.8  |      |     |     |      |
| Fli1                 | GATA1      | 468  | 2.6                     | -2.1 |      |      | 3.9 |      | -1.9 | 6.5 |      | 2.9  |      |     |     |      |
| Fli1                 | TAL1       | 501  | 2.9                     | -2.3 |      | 2.3  | 4.5 |      | -2.1 | 6.8 |      | 2.8  |      |     | 2.2 |      |
| Fli1                 | FLI1       | 1012 |                         |      |      |      |     |      |      | 2.2 | -6.3 |      |      |     |     |      |
| Fli1                 | GATA2      | 357  | 2.0                     |      |      |      | 3.6 |      |      | 4.7 |      |      |      |     |     |      |
| Gata2                | GATA1/TAL1 | 217  | 3.2                     | -3.6 |      |      | 5.6 | 2.3  | -2.9 | 8.8 |      |      |      |     |     |      |
| Gata2                | GATA1      | 344  | 2.7                     | -2.0 |      |      | 4.5 |      |      | 6.7 |      | 2.7  |      |     |     |      |
| Gata2                | TAL1       | 309  | 3.0                     | -2.7 |      |      | 5.0 | 2.0  | -2.5 | 7.1 |      | 2.6  |      |     |     |      |
| Gata2                | FLI1       | 166  | 2.5                     |      |      |      | 4.5 |      |      | 7.8 |      |      |      |     |     |      |
| Gata2                | GATA2      | 338  | 2.1                     |      |      |      | 3.9 |      |      | 5.0 |      |      |      |     |     |      |
| Lmo2                 | GATA1/TAL1 | 308  | 3.2                     | -4.1 |      |      | 5.5 | 2.3  | -4.6 | 8.4 |      | 2.7  |      |     |     |      |
| Lmo2                 | GATA1      | 401  | 2.9                     | -2.9 |      |      | 4.7 | 2.1  | -3.0 | 7.4 |      | 2.8  |      |     |     |      |
| Lmo2                 | TAL1       | 508  | 3.0                     | -2.3 |      | 2.4  | 4.7 | 2.0  | -2.2 | 7.0 |      | 2.4  |      |     |     |      |
| Lmo2                 | FLI1       | 250  | 2.5                     |      |      |      | 4.4 |      |      | 6.5 |      |      |      |     |     |      |
| Lmo2                 | GATA2      | 315  | 2.3                     |      |      |      | 4.1 |      |      | 5.5 |      |      |      |     |     |      |
| Lyl1                 | GATA1/TAL1 | 199  | 3.2                     | -4.3 |      |      | 4.8 | 2.4  | -3.0 | 9.6 |      |      |      |     |     |      |
| Lyl1                 | GATA1      | 245  | 3.0                     | -3.5 |      |      | 4.5 | 2.2  | -2.7 | 8.5 |      | 2.9  |      |     |     |      |
| Lyl1                 | TAL1       | 304  | 2.9                     | -2.4 |      |      | 4.1 | 2.2  |      | 7.7 |      |      |      |     |     |      |
| Lyl1                 | FLI1       | 137  | 2.8                     |      |      |      | 4.3 |      |      | 9.4 |      |      |      |     |     |      |
| Lyl1                 | GATA2      | 215  | 2.5                     |      |      |      | 4.0 |      |      | 6.0 |      |      |      |     |     |      |
| PU1                  | GATA1/TAL1 | 116  | 2.8                     | -3.6 |      |      | 5.1 |      |      | 7.3 |      |      |      |     |     |      |
| PU1                  | GATA1      | 260  | 1.9                     |      |      |      | 3.0 |      |      | 4.5 |      |      |      |     |     |      |
| PU1                  | TAL1       | 224  | 2.6                     | -2.0 |      |      | 4.1 |      |      | 5.8 |      |      |      |     |     |      |
| PU1                  | FLI1       | 949  |                         |      |      |      |     |      |      |     |      |      |      |     |     |      |
| PU1                  | GATA2      | 307  |                         |      |      |      |     |      |      | 2.9 |      |      |      |     |     |      |
| Runx1                | GATA1/TAL1 | 211  | 3.1                     | -3.8 |      |      | 5.4 | 2.2  | -3.2 | 8.5 |      |      |      |     |     |      |
| Runx1                | GATA1      | 286  | 2.8                     | -2.8 |      |      | 4.5 |      | -2.4 | 7.3 |      | 2.8  |      |     |     |      |
| Runx1                | TAL1       | 324  | 2.8                     | -2.0 |      |      | 4.6 |      |      | 6.7 |      |      |      |     |     |      |
| Runx1                | FLI1       | 246  | 2.1                     |      |      |      | 3.5 |      |      | 6.6 |      |      |      |     |     |      |
| Runx1                | GATA2      | 244  | 2.4                     |      |      |      | 4.1 |      |      | 5.7 |      |      |      |     |     |      |
| SCL                  | GATA1/TAL1 | 279  | 3.1                     | -4.0 |      |      | 5.3 | 2.3  | -4.2 | 8.0 |      | 2.7  |      |     |     |      |
| SCL                  | GATA1      | 373  | 2.7                     | -2.7 |      |      | 4.4 | 2.1  | -2.3 | 6.6 |      | 2.6  |      |     |     |      |
| SCL                  | TAL1       | 453  | 2.8                     | -2.3 |      |      | 4.4 | 1.9  | -2.2 | 6.3 |      | 2.4  |      |     |     |      |
| SCL                  | FLI1       | 635  |                         |      |      |      | 2.3 |      |      | 2.6 |      |      |      |     |     |      |
| SCL                  | GATA2      | 293  | 2.1                     |      |      |      | 3.8 |      |      | 5.2 |      |      |      |     |     |      |

Overlapping OSs MEG/HPC-7

**Supplemental Figure 11. Enrichment of HPC-7 and MEG transcription factor OSs across developmental gene clusters.** *U*, up-regulated. *D*, down-regulated. *N*, no change. The enrichment value is a ratio of the fraction of genes in a given cluster occupied by a given transcription factor, *versus* the fraction of occupied genes in the global expressed gene set of 7513 genes. All enrichments shown have *p*-values <0.001 by Fisher exact test.

A

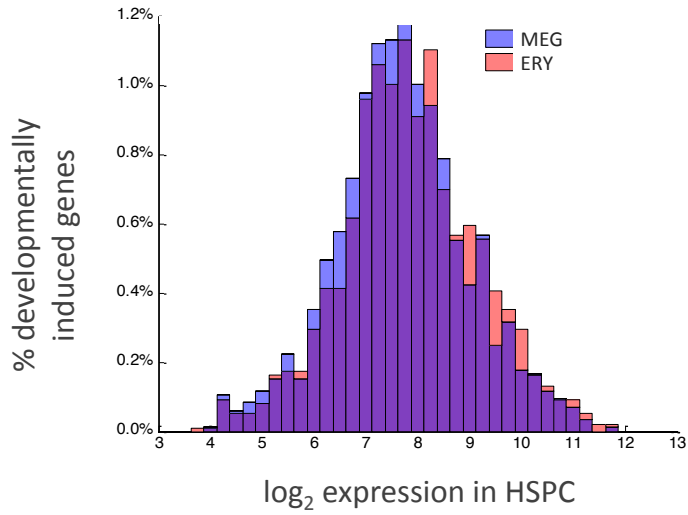

B

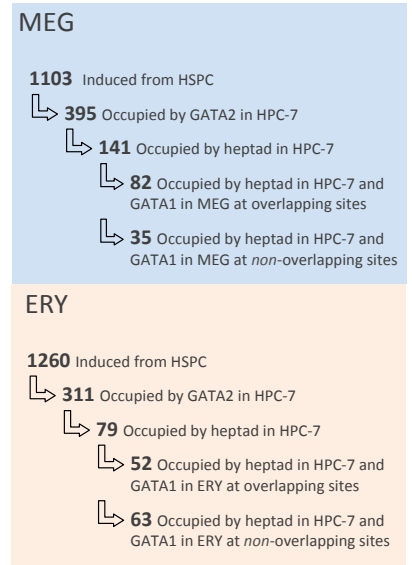

**Supplemental Figure 12. Gene priming in ERY and MEG.** A, Distribution of MEG and ERY-induced genes according to starting expression levels in HSPCs. Purple bars indicate areas of overlap between MEG and ERY. B, Numbers of GATA2 and heptad-occupied genes in MEG and ERY development.

| ERY        |            |      | All ERY-regulated genes |      |      | Non-primed |     | Primed |      |     |      |      |     |     |     |     |   |   |   |   |   |   |   |   |   |     |      |   |   |   |   |   |   |   |   |   |   |
|------------|------------|------|-------------------------|------|------|------------|-----|--------|------|-----|------|------|-----|-----|-----|-----|---|---|---|---|---|---|---|---|---|-----|------|---|---|---|---|---|---|---|---|---|---|
|            |            |      | MEG                     |      |      | U          |     | U      |      | 1   |      |      | 2   |     |     | 3   |   |   | 4 |   |   | 5 |   |   | 6 |     |      | 7 |   |   | 8 |   |   | 9 |   |   |   |
| ERY        |            |      | U                       | D    | N    | U          | U   | U      | D    | D   | U    | N    | N   | N   | U   | D   | N | U | D | N | U | D | N | U | D | N   | U    | D | N | U | D | N |   |   |   |   |   |
| HPC7       | ERY        | 7513 | 1260                    | 1865 | 1153 | 170        | 286 | 380    | 898  | 134 | 93   | 171  | 121 | 181 | 173 | 280 |   |   |   |   |   |   |   |   |   |     |      |   |   |   |   |   |   |   |   |   |   |
| ERG        |            | 6817 | -1.1                    | 1.0  | .    | -2.0       | .   | -1.1   | .    | .   | -1.4 | -1.1 | .   | .   | .   | .   | . | . | . | . | . | . | . | . | . | .   | .    | . | . | . | . |   |   |   |   |   |   |
| Fli1       |            | 4211 | -1.2                    | 1.2  | .    | -1.9       | .   | .      | .    | 1.6 | -1.5 | .    | .   | .   | .   | .   | . | . | . | . | . | . | . | . | . | .   | 1.4  | . | . | . | . |   |   |   |   |   |   |
| Gata2      |            | 1770 | .                       | 1.3  | .    | .          | .   | .      | .    | 2.7 | .    | 1.6  | .   | .   | .   | .   | . | . | . | . | . | . | . | . | . | .   | .    | . | . | . | . | . |   |   |   |   |   |
| Lmo2       |            | 1964 | .                       | 1.2  | .    | .          | 1.4 | 1.3    | .    | 2.7 | .    | 1.5  | .   | .   | .   | .   | . | . | . | . | . | . | . | . | . | 1.5 | -1.8 | . | . | . | . | . |   |   |   |   |   |
| Lyl1       |            | 938  | .                       | 1.4  | .    | .          | .   | 1.5    | .    | 4.1 | .    | 1.8  | .   | .   | .   | .   | . | . | . | . | . | . | . | . | . | 2.2 | .    | . | . | . | . | . |   |   |   |   |   |
| PU1        |            | 5343 | -1.1                    | 1.1  | .    | -2.0       | .   | .      | .    | 1.2 | -1.3 | .    | .   | .   | .   | .   | . | . | . | . | . | . | . | . | . | 1.2 | .    | . | . | . | . | . | . |   |   |   |   |
| Runx1      |            | 1410 | .                       | 1.4  | .    | .          | .   | .      | .    | 3.3 | .    | .    | .   | .   | .   | .   | . | . | . | . | . | . | . | . | . | .   | .    | . | . | . | . | . | . |   |   |   |   |
| SCL        |            | 3082 | -1.2                    | .    | .    | -2.2       | .   | .      | .    | 1.7 | .    | .    | .   | .   | .   | .   | . | . | . | . | . | . | . | . | . | .   | 1.3  | . | . | . | . | . | . |   |   |   |   |
| GATA1/TAL1 |            | 1199 | 2.8                     | -2.9 | .    | 2.2        | 3.6 | 2.8    | -3.0 | .   | 3.2  | .    | .   | .   | .   | .   | . | . | . | . | . | . | . | . | . | 3.2 | -2.3 | . | . | . | . | . | . |   |   |   |   |
| GATA1/TAL1 |            | 2411 | 1.9                     | -1.8 | .    | 1.4        | 2.3 | 1.9    | -2.0 | .   | 1.9  | .    | .   | .   | .   | .   | . | . | . | . | . | . | . | . | . | 2.1 | -1.6 | . | . | . | . | . | . | . |   |   |   |
| TAL1       |            | 1352 | 2.7                     | -2.6 | .    | 2.1        | 3.4 | 2.6    | -2.9 | .   | 2.9  | .    | .   | .   | .   | .   | . | . | . | . | . | . | . | . | . | 2.9 | -2.2 | . | . | . | . | . | . | . |   |   |   |
| ERG        | GATA1/TAL1 | 365  | 2.8                     | -2.2 | .    | .          | 4.0 | 3.3    | -3.4 | .   | .    | .    | .   | .   | .   | .   | . | . | . | . | . | . | . | . | . | 3.5 | .    | . | . | . | . | . | . | . |   |   |   |
| ERG        | GATA1      | 1003 | 1.6                     | -1.5 | .    | .          | 2.1 | 1.9    | -1.6 | .   | .    | .    | .   | .   | .   | .   | . | . | . | . | . | . | . | . | . | 1.8 | .    | . | . | . | . | . | . | . |   |   |   |
| ERG        | TAL1       | 437  | 2.7                     | -2.3 | .    | .          | 3.8 | 2.9    | -3.7 | .   | .    | .    | .   | .   | .   | .   | . | . | . | . | . | . | . | . | . | 3.4 | .    | . | . | . | . | . | . | . | . |   |   |
| Fli1       | GATA1/TAL1 | 243  | 2.8                     | -2.2 | .    | .          | 4.1 | 3.7    | -5.8 | .   | .    | .    | .   | .   | .   | .   | . | . | . | . | . | . | . | . | . | 2.9 | .    | . | . | . | . | . | . | . | . |   |   |
| Fli1       | GATA1      | 544  | 1.7                     | -1.6 | .    | .          | 2.5 | 2.2    | -2.3 | .   | .    | .    | .   | .   | .   | .   | . | . | . | . | . | . | . | . | . | 2.1 | .    | . | . | . | . | . | . | . | . |   |   |
| Fli1       | TAL1       | 269  | 2.7                     | -2.2 | .    | .          | 3.9 | 3.4    | -6.4 | .   | .    | .    | .   | .   | .   | .   | . | . | . | . | . | . | . | . | . | 2.9 | .    | . | . | . | . | . | . | . | . |   |   |
| Gata2      | GATA1/TAL1 | 227  | 2.6                     | -2.0 | .    | .          | 3.8 | 3.6    | -3.0 | .   | .    | .    | .   | .   | .   | .   | . | . | . | . | . | . | . | . | . | 2.9 | .    | . | . | . | . | . | . | . | . |   |   |
| Gata2      | GATA1      | 494  | 1.8                     | -1.5 | .    | .          | 2.4 | 2.5    | -1.9 | .   | .    | .    | .   | .   | .   | .   | . | . | . | . | . | . | . | . | . | .   | .    | . | . | . | . | . | . | . | . | . |   |
| Gata2      | TAL1       | 243  | 2.6                     | -2.0 | .    | .          | 3.7 | 3.3    | -3.2 | .   | .    | .    | .   | .   | .   | .   | . | . | . | . | . | . | . | . | . | 2.9 | .    | . | . | . | . | . | . | . | . | . |   |
| Lmo2       | GATA1/TAL1 | 368  | 3.1                     | -2.3 | .    | .          | 4.1 | 4.4    | -3.1 | .   | .    | .    | .   | .   | .   | .   | . | . | . | . | . | . | . | . | . | 3.3 | .    | . | . | . | . | . | . | . | . |   |   |
| Lmo2       | GATA1      | 463  | 2.7                     | -1.8 | .    | .          | 3.6 | 3.8    | -2.5 | .   | .    | .    | .   | .   | .   | .   | . | . | . | . | . | . | . | . | . | 3.0 | .    | . | . | . | . | . | . | . | . | . |   |
| Lmo2       | TAL1       | 394  | 3.0                     | -2.2 | .    | 2.2        | 3.9 | 4.2    | -3.1 | .   | .    | .    | .   | .   | .   | .   | . | . | . | . | . | . | . | . | . | 3.1 | .    | . | . | . | . | . | . | . | . | . |   |
| Lyl1       | GATA1/TAL1 | 162  | 2.8                     | -2.1 | .    | .          | 4.4 | 4.0    | -3.9 | .   | .    | .    | .   | .   | .   | .   | . | . | . | . | . | . | . | . | . | 3.1 | .    | . | . | . | . | . | . | . | . | . |   |
| Lyl1       | GATA1      | 203  | 2.6                     | .    | .    | .          | 4.0 | 3.7    | -3.5 | .   | .    | .    | .   | .   | .   | .   | . | . | . | . | . | . | . | . | . | 3.3 | .    | . | . | . | . | . | . | . | . | . |   |
| Lyl1       | TAL1       | 173  | 2.6                     | -2.1 | .    | .          | 4.1 | 3.8    | -4.1 | .   | .    | .    | .   | .   | .   | .   | . | . | . | . | . | . | . | . | . | .   | .    | . | . | . | . | . | . | . | . | . |   |
| PU1        | GATA1/TAL1 | 153  | 2.5                     | .    | .    | .          | 3.6 | 2.8    | .    | .   | .    | .    | .   | .   | .   | .   | . | . | . | . | . | . | . | . | . | 4.1 | .    | . | . | . | . | . | . | . | . | . |   |
| PU1        | GATA1      | 533  | 1.6                     | -1.5 | .    | .          | 2.0 | 1.8    | -1.9 | .   | .    | .    | .   | .   | .   | .   | . | . | . | . | . | . | . | . | . | 2.0 | .    | . | . | . | . | . | . | . | . | . |   |
| PU1        | TAL1       | 198  | 2.4                     | .    | .    | .          | 3.3 | 2.4    | .    | .   | .    | .    | .   | .   | .   | .   | . | . | . | . | . | . | . | . | . | 3.6 | .    | . | . | . | . | . | . | . | . | . |   |
| Runx1      | GATA1/TAL1 | 178  | 2.9                     | -2.0 | .    | .          | 4.4 | 3.8    | .    | .   | .    | .    | .   | .   | .   | .   | . | . | . | . | . | . | . | . | . | .   | .    | . | . | . | . | . | . | . | . | . |   |
| Runx1      | GATA1      | 242  | 2.5                     | -1.9 | .    | .          | 3.8 | 3.3    | -2.4 | .   | .    | .    | .   | .   | .   | .   | . | . | . | . | . | . | . | . | . | .   | .    | . | . | . | . | . | . | . | . | . | . |
| Runx1      | TAL1       | 195  | 2.6                     | .    | .    | .          | 4.0 | 3.4    | .    | .   | .    | .    | .   | .   | .   | .   | . | . | . | . | . | . | . | . | . | .   | .    | . | . | . | . | . | . | . | . | . | . |
| SCL        | GATA1/TAL1 | 291  | 2.8                     | -2.0 | .    | .          | 4.3 | 3.7    | -3.2 | .   | .    | .    | .   | .   | .   | .   | . | . | . | . | . | . | . | . | . | 3.6 | .    | . | . | . | . | . | . | . | . | . |   |
| SCL        | GATA1      | 529  | 1.9                     | -1.8 | .    | .          | 2.7 | 2.4    | -2.0 | .   | .    | .    | .   | .   | .   | .   | . | . | . | . | . | . | . | . | . | 2.3 | .    | . | . | . | . | . | . | . | . | . |   |
| SCL        | TAL1       | 323  | 2.7                     | -2.1 | .    | .          | 4.1 | 3.5    | -3.5 | .   | .    | .    | .   | .   | .   | .   | . | . | . | . | . | . | . | . | . | 3.5 | .    | . | . | . | . | . | . | . | . | . |   |

**Supplemental Figure 13. Enrichment of HPC-7 and ERY transcription factor OSs across developmental gene clusters.** *U*, up-regulated. *D*, down-regulated. *N*, no change. The enrichment value is a ratio of the fraction of genes in a given cluster occupied by a given transcription factor, *versus* the fraction of occupied genes in the global expressed gene set of 7513 genes. All enrichments shown have *p*-values <0.001 by Fisher exact test.

# MEG

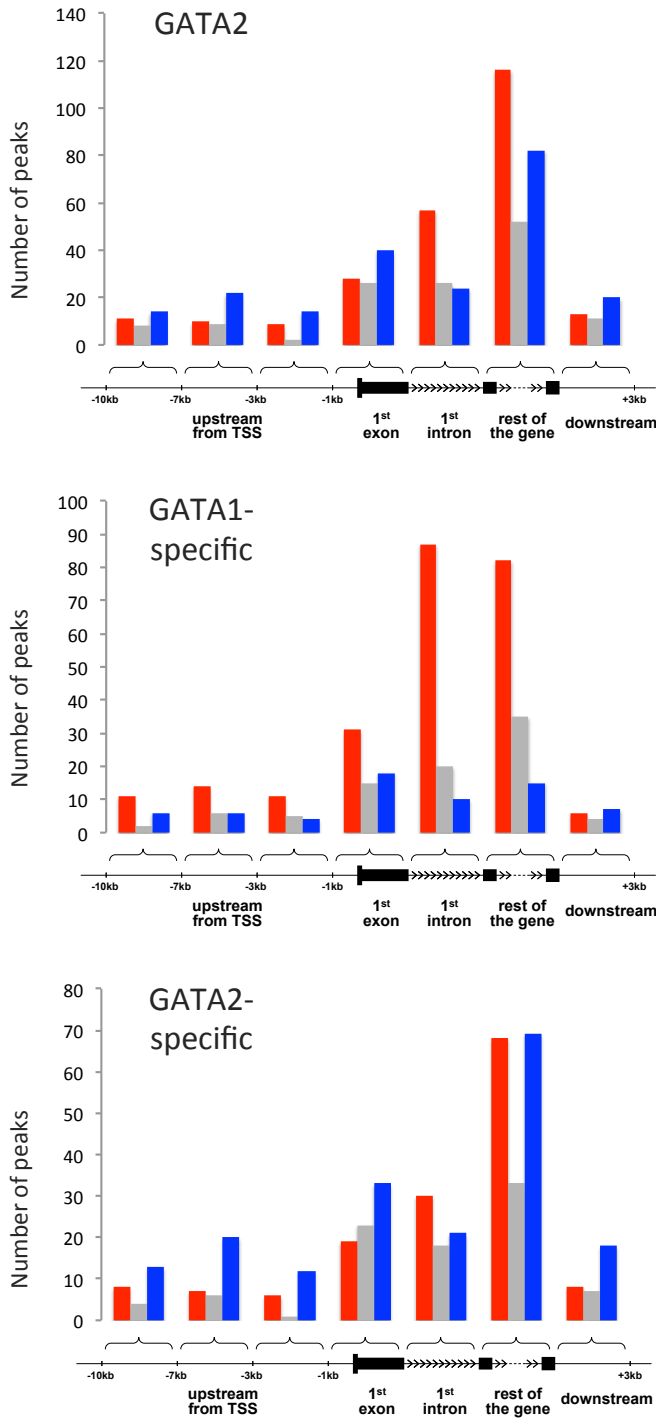

**Supplemental Figure 14. Distribution of transcription factor OSs across gene structure and its correlation with the developmental gene expression response in MEG.** Distribution of GATA2 (all), GATA2-specific and GATA1-specific OSs across the gene structure, shown as the absolute number of peaks called in a given gene segment, in up-regulated (red), down-regulated (blue) and non-responsive (grey) gene categories. Introns are represented by thin lines with arrows marking the direction of transcription.

# MEG

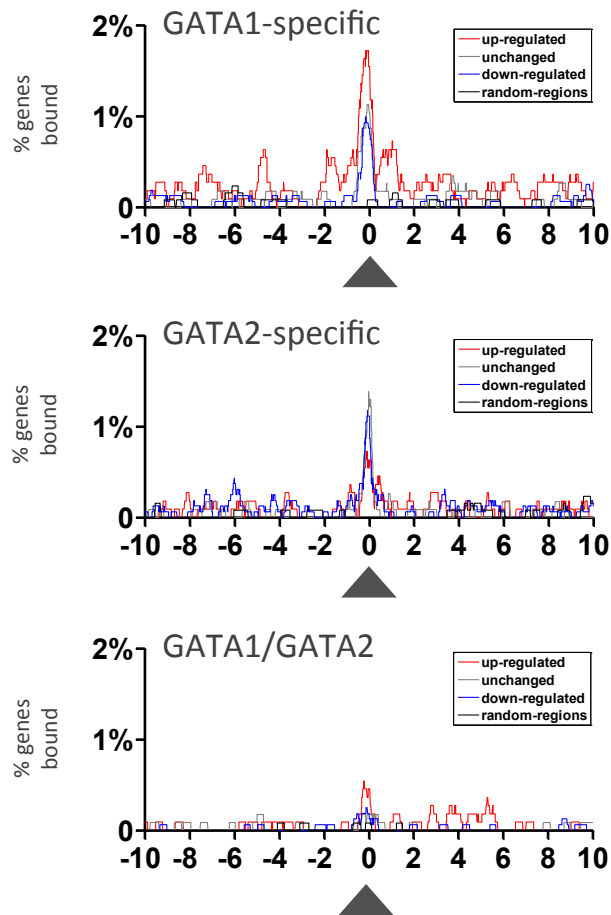

**Supplemental Figure 15. Distribution of GATA OSs sites relative to TSS (indicated by black arrows) in up-regulated, down-regulated and non-responsive gene categories in MEG.** Horizontal axis, Kb from upstream or downstream from TSS (arrow). Vertical axis, % genes in a given response category with at least one transcription factor binding peak.
