# Supplementary material for: Divergent functions of hematopoietic transcription factors in lineage priming and differentiation during erythro-megakaryopoiesis
Source: PubMed Central journal article supplement (PMC4248311; doi:10.1101/gr.164178.113), 2014-12
Supplement: supp_gr.164178.113_Supplemental_Tables.pdf [file supp_gr.164178.113_Supplemental_Tables.pdf]

**Supplementary Table 1. Developmental priming of MEG genes by the GATA2/LYL1/ TAL1/FLI1/ERG/RUNX1/LMO2 transcription**

**factor heptad.** The table shows developmentally induced MEG genes that are occupied by the heptad in HPC-7 cells (Wilson et al, 2010) and by GATA1 in maturing MEG cells, respectively, at overlapping OSs. The directionality of the developmental response in the alternate lineage is also shown along with the fold change of gene expression. Blank values indicate indeterminable response (fold change between 1.2 and 2, or FDR > 0.05). Selected MEG-specific genes are **bolded**. Common MEG-ERY primed genes are *italicized*.

| Accession No | Description                                             | Gene symbol       | Expression in HSPC | Expression change in MEG, fold | Expression change in ERY, fold | Response in MEG | Response in ERY | Bound by heptad in HPC-7 | Bound by heptad in HPC-7 and GATA1 in MEG at overlapping site | Bound by heptad in HPC-7 and TAL1 in MEG at overlapping site |
|--------------|---------------------------------------------------------|-------------------|--------------------|--------------------------------|--------------------------------|-----------------|-----------------|--------------------------|---------------------------------------------------------------|--------------------------------------------------------------|
| NM_175367    | <i>stonin-2</i>                                         | <i>Ston2</i>      | 7.86               | 8.49                           | 3.66                           | up              | up              | yes                      | no                                                            | no                                                           |
| NM_018784    | <i>type 2 lactosamine alpha-2,3-sialyltransferase</i>   | <i>St3gal6</i>    | 7.13               | 8.39                           | 6.24                           | up              | up              | yes                      | yes                                                           | yes                                                          |
| NM_010433    | <i>homeodomain-interacting protein kinase 2 isoform</i> | <i>Hipk2</i>      | 9.36               | 3.66                           | 6.74                           | up              | up              | yes                      | no                                                            | no                                                           |
| NM_133167    | <i>beta-parvin</i>                                      | <i>Parvb</i>      | 7.86               | 20.29                          | 3.75                           | up              | up              | yes                      | no                                                            | no                                                           |
| NM_010587    | <i>intersectin-1 isoform 1</i>                          | <i>Itsn1</i>      | 6.42               | 3.73                           | 7.12                           | up              | up              | yes                      | yes                                                           | yes                                                          |
| NM_138953    | <i>RNA polymerase II elongation factor ELL2</i>         | <i>Ell2</i>       | 6.87               | 6.52                           | 28.53                          | up              | up              | yes                      | no                                                            | yes                                                          |
| NM_028759    | <i>DDB1- and CUL4-associated factor 6</i>               | <i>Dcaf6</i>      | 7.28               | 2.91                           | 5.97                           | up              | up              | yes                      | no                                                            | no                                                           |
| NM_013862    | <i>rab GTPase-activating protein 1-like isoform a</i>   | <i>Rabgap1l</i>   | 6.52               | 6.33                           | 5.93                           | up              | up              | yes                      | no                                                            | no                                                           |
| NM_010026    | <i>arf-GAP with SH3 domain, ANK repeat and PH</i>       | <i>Asap1</i>      | 8.77               | 4.49                           | 4.68                           | up              | up              | yes                      | no                                                            | no                                                           |
| NM_001081232 | <i>hypothetical protein LOC320661</i>                   | <i>D5ErtD579e</i> | 5.55               | 4.52                           | 12.84                          | up              | up              | yes                      | no                                                            | no                                                           |
| NM_001081308 | <i>serine/threonine-protein kinase TAO3</i>             | <i>Taok3</i>      | 8.29               | 3.91                           | 2.43                           | up              | up              | yes                      | no                                                            | yes                                                          |
| NM_026148    | <i>LIM and senescent cell antigen-like-containing</i>   | <i>Lims1</i>      | 8.49               | 9.02                           | 2.87                           | up              | up              | yes                      | yes                                                           | yes                                                          |
| NM_023605    | <i>F-box only protein 9 isoform 1</i>                   | <i>Fbxo9</i>      | 7.63               | 3.15                           | 5.66                           | up              | up              | yes                      | yes                                                           | yes                                                          |
| NM_172473    | <i>E3 ubiquitin-protein ligase HACE1</i>                | <i>Hace1</i>      | 7.09               | 3.13                           | 10.74                          | up              | up              | yes                      | no                                                            | no                                                           |
| NM_145541    | <i>ras-related protein Rap-1A precursor</i>             | <i>Rap1a</i>      | 8.89               | 8.22                           | 4.93                           | up              | up              | yes                      | yes                                                           | yes                                                          |
| NM_026735    | <i>mps one binder kinase activator-like 1A</i>          | <i>Mobk11a</i>    | 7.84               | 7.85                           | 3.76                           | up              | up              | yes                      | no                                                            | no                                                           |
| NM_026921    | <i>iron-sulfur cluster assembly 1 homolog,</i>          | <i>Isca1</i>      | 8.11               | 3.07                           | 7.84                           | up              | up              | yes                      | yes                                                           | yes                                                          |
| NM_146025    | <i>sterile alpha motif domain-containing protein 14</i> | <i>Samd14</i>     | 8.49               | 4.67                           | 5.12                           | up              | up              | yes                      | no                                                            | no                                                           |

| Accession No | Description                                                                                           | Gene symbol      | Expression in HSPC | Expression change in MEG, fold | Expression change in ERY, fold | Response in MEG | Response in ERY | Bound by heptad in HPC-7 | Bound by heptad in HPC-7 and GATA1 in MEG at overlapping site | Bound by heptad in HPC-7 and TAL1 in MEG at overlapping site |
|--------------|-------------------------------------------------------------------------------------------------------|------------------|--------------------|--------------------------------|--------------------------------|-----------------|-----------------|--------------------------|---------------------------------------------------------------|--------------------------------------------------------------|
| NM_001164557 | <i>PDZK1-interacting protein 1 isoform 1</i>                                                          | <i>Pdzk1ip1</i>  | 7.27               | 4.05                           | 4.38                           | up              | up              | yes                      | no                                                            | yes                                                          |
| NM_153538    | <i>terminal uridylyltransferase 7</i>                                                                 | <i>Zcchc6</i>    | 7.87               | 3.23                           | 8.58                           | up              | up              | yes                      | yes                                                           | yes                                                          |
| NM_145486    | <i>E3 ubiquitin-protein ligase MARCH2</i>                                                             | <i>40604</i>     | 9.18               | 3.27                           | 6.85                           | up              | up              | yes                      | yes                                                           | yes                                                          |
| NM_028011    | <i>TOM1-like protein 1</i>                                                                            | <i>Tom111</i>    | 7.69               | 6.55                           | 7.48                           | up              | up              | yes                      | yes                                                           | yes                                                          |
| NM_026004    | <i>cytosolic 5'-nucleotidase 3</i>                                                                    | <i>Nt5c3</i>     | 7.03               | 9.18                           | 11.47                          | up              | up              | yes                      | yes                                                           | no                                                           |
| NM_001080977 | <i>round spermatid basic protein 1-like</i>                                                           | <i>Rsb1l</i>     | 7.65               | 7.35                           | 3.84                           | up              | up              | yes                      | no                                                            | no                                                           |
| NM_021461    | <i>MAP kinase-interacting serine/threonine-protein V-type proton ATPase 116 kDa subunit a isoform</i> | <i>Mknk1</i>     | 8.99               | 5.74                           | 2.31                           | up              | up              | yes                      | yes                                                           | yes                                                          |
| NM_016920    | <i>V-type proton ATPase 116 kDa subunit a isoform</i>                                                 | <i>Atp6v0a1</i>  | 8.60               | 6.08                           | 7.31                           | up              | up              | yes                      | yes                                                           | yes                                                          |
| NM_011158    | <i>cAMP-dependent protein kinase type II-beta</i>                                                     | <i>Prkar2b</i>   | 8.66               | 12.05                          | 5.61                           | up              | up              | yes                      | yes                                                           | yes                                                          |
| NM_009177    | <i>CMP-N-acetylneuraminate-beta-galactosamide-phosphatidylcholine:ceramide</i>                        | <i>St3gal1</i>   | 9.68               | 2.77                           | 2.35                           | up              | up              | yes                      | yes                                                           | yes                                                          |
| NM_001168525 | <i>phosphatidylcholine:ceramide</i>                                                                   | <i>Sgms1</i>     | 8.04               | 3.87                           | 3.11                           | up              | up              | yes                      | yes                                                           | yes                                                          |
| NM_173755    | <i>ubiquitin-conjugating enzyme E2 O</i>                                                              | <i>Ube2o</i>     | 8.52               | 4.85                           | 10.65                          | up              | up              | yes                      | no                                                            | yes                                                          |
| NM_011170    | <i>major prion protein precursor</i>                                                                  | <i>Prnp</i>      | 5.58               | 3.00                           | 8.21                           | up              | up              | yes                      | no                                                            | no                                                           |
| NM_009179    | <i>CMP-N-acetylneuraminate-beta-galactosamide-phosphatidylcholine:ceramide</i>                        | <i>St3gal2</i>   | 7.79               | 2.74                           | 3.97                           | up              | up              | yes                      | no                                                            | yes                                                          |
| NM_008207    | <i>histocompatibility 2, T region locus 24</i>                                                        | <i>H2-T24</i>    | 6.79               | 6.76                           | 7.21                           | up              | up              | yes                      | no                                                            | yes                                                          |
| NM_177857    | <i>DENN domain-containing protein 2C</i>                                                              | <i>Dennd2c</i>   | 6.27               | 12.94                          | 14.80                          | up              | up              | yes                      | yes                                                           | yes                                                          |
| NM_023738    | <i>ubiquitin-like modifier-activating enzyme 7</i>                                                    | <i>Uba7</i>      | 7.63               | 4.14                           | 2.92                           | up              | up              | yes                      | yes                                                           | yes                                                          |
| NM_001033550 | <i>leucine-rich repeat-containing protein 8B</i>                                                      | <i>Lrrc8b</i>    | 9.15               | 3.42                           | 3.47                           | up              | up              | yes                      | yes                                                           | yes                                                          |
| NM_001033488 | <i>major facilitator superfamily domain-containing</i>                                                | <i>Mfsd2b</i>    | 9.27               | 4.22                           | 3.08                           | up              | up              | yes                      | yes                                                           | yes                                                          |
| NM_008982    | <i>receptor-type tyrosine-protein phosphatase eta</i>                                                 | <i>Ptprj</i>     | 8.32               | 12.25                          | -1.00                          | up              | nch             | yes                      | no                                                            | no                                                           |
| NM_139272    | <i>polypeptide N-acetylgalactosaminyltransferase 2</i>                                                | <i>Galnt2</i>    | 9.14               | 3.14                           | -1.13                          | up              | nch             | yes                      | no                                                            | no                                                           |
| NM_207708    | <i>synaptogyrin-1 isoform 1a</i>                                                                      | <i>Syng1</i>     | 8.09               | 3.46                           | 1.16                           | up              | nch             | yes                      | no                                                            | yes                                                          |
| NM_027238    | <i>tetratricopeptide repeat protein 39B</i>                                                           | <i>Ttc39b</i>    | 5.34               | 18.17                          | -1.08                          | up              | nch             | yes                      | yes                                                           | yes                                                          |
| NM_134250    | <i>hepatitis A virus cellular receptor 2 homolog</i>                                                  | <i>Havcr2</i>    | 5.55               | 9.56                           | 1.15                           | up              | nch             | yes                      | yes                                                           | yes                                                          |
| NM_029166    | <i>UHRF1-binding protein 1-like</i>                                                                   | <i>Uhrf1bp1l</i> | 8.14               | 6.10                           | 1.15                           | up              | nch             | yes                      | yes                                                           | yes                                                          |

| Accession No | Description                                      | Gene symbol | Expression in HSPC | Expression change in MEG, fold | Expression change in ERY, fold | Response in MEG | Response in ERY | Bound by heptad in HPC-7 | Bound by heptad in HPC-7 and GATA1 in MEG at overlapping site | Bound by heptad in HPC-7 and TAL1 in MEG at overlapping site |
|--------------|--------------------------------------------------|-------------|--------------------|--------------------------------|--------------------------------|-----------------|-----------------|--------------------------|---------------------------------------------------------------|--------------------------------------------------------------|
| NM_029153    | secretory carrier-associated membrane protein 1  | Scamp1      | 8.31               | 3.70                           | -1.07                          | up              | nch             | yes                      | yes                                                           | no                                                           |
| NM_009624    | adenylate cyclase type 9                         | Adcy9       | 7.00               | 6.63                           | -1.09                          | up              | nch             | yes                      | yes                                                           | yes                                                          |
| NM_007858    | protein diaphanous homolog 1                     | Diap1       | 8.23               | 5.18                           | 1.14                           | up              | nch             | yes                      | yes                                                           | yes                                                          |
| NM_001033319 | liprin-alpha-1 isoform B                         | Ppfia1      | 8.35               | 4.34                           | 1.13                           | up              | nch             | yes                      | yes                                                           | yes                                                          |
| NM_001001979 | multiple epidermal growth factor-like domains    | Megf10      | 5.93               | 7.08                           | 1.07                           | up              | nch             | yes                      | yes                                                           | no                                                           |
| NM_033565    | AF4/FMR2 family member 4                         | Aff4        | 8.78               | 5.49                           | 1.14                           | up              | nch             | yes                      | no                                                            | no                                                           |
| NM_011250    | retinoblastoma-like protein 2                    | Rbl2        | 7.67               | 2.90                           | 1.14                           | up              | nch             | yes                      | no                                                            | no                                                           |
| NM_009283    | signal transducer and activator of transcription | Stat1       | 7.91               | 3.09                           | -1.17                          | up              | nch             | yes                      | no                                                            | yes                                                          |
| NM_001164767 | roundabout homolog 3                             | Robo3       | 5.54               | 8.02                           | -1.11                          | up              | nch             | yes                      | no                                                            | yes                                                          |
| NM_008880    | phospholipid scramblase 2                        | Plscr2      | 4.24               | 11.55                          | 1.15                           | up              | nch             | yes                      | yes                                                           | no                                                           |
| NM_175750    | plexin-A4 precursor                              | Plxna4      | 6.23               | 20.24                          | -1.04                          | up              | nch             | yes                      | yes                                                           | yes                                                          |
| NM_013571    | kinase suppressor of Ras 1                       | Ksr1        | 8.37               | 2.10                           | 1.15                           | up              | nch             | yes                      | yes                                                           | yes                                                          |
| NM_080448    | SLIT-ROBO Rho GTPase-activating protein 3        | Srgap3      | 6.88               | 5.39                           | -2.26                          | up              | down            | yes                      | no                                                            | no                                                           |
| NM_011104    | protein kinase C epsilon type                    | Prkce       | 7.25               | 2.92                           | -2.24                          | up              | down            | yes                      | no                                                            | no                                                           |
| NM_009640    | angiopoietin-1 precursor                         | Angpt1      | 7.28               | 6.58                           | -6.56                          | up              | down            | yes                      | no                                                            | no                                                           |
| NM_053195    | sodium/potassium/calcium exchanger 3             | Slc24a3     | 7.59               | 6.61                           | -3.11                          | up              | down            | yes                      | no                                                            | yes                                                          |
| NM_133829    | major facilitator superfamily domain-containing  | Mfsd6       | 7.17               | 6.19                           | -3.30                          | up              | down            | yes                      | no                                                            | yes                                                          |
| NM_010170    | proteinase-activated receptor 3 precursor        | F2r2        | 8.37               | 14.98                          | -3.43                          | up              | down            | yes                      | yes                                                           | no                                                           |
| NM_031257    | pleckstrin homology domain-containing family A   | Plekha2     | 8.78               | 3.53                           | -4.95                          | up              | down            | yes                      | no                                                            | no                                                           |
| NM_001177648 | formin-binding protein 1 isoform c               | Fnbp1       | 9.31               | 2.24                           | -4.07                          | up              | down            | yes                      | yes                                                           | no                                                           |
| NM_153408    | E3 ubiquitin-protein ligase NEURL3               | Neurl3      | 7.75               | 2.44                           | -4.12                          | up              | down            | yes                      | yes                                                           | yes                                                          |
| NM_028238    | ras-related protein Rab-38                       | Rab38       | 8.22               | 2.38                           | -3.57                          | up              | down            | yes                      | yes                                                           | yes                                                          |
| NM_183355    | pre-B-cell leukemia transcription factor 1       | Pbx1        | 7.92               | 5.13                           | -2.55                          | up              | down            | yes                      | yes                                                           | yes                                                          |
| NM_175836    | spectrin beta chain, brain 1 isoform 1           | Spnb2       | 9.33               | 3.00                           | -3.43                          | up              | down            | yes                      | yes                                                           | yes                                                          |
| NM_026910    | traf2 and NCK-interacting protein kinase isoform | Tnik        | 7.64               | 7.79                           | -2.57                          | up              | down            | yes                      | yes                                                           | yes                                                          |
| NM_011932    | dual adapter for phosphotyrosine and...          | Dapp1       | 9.83               | 2.63                           | -3.23                          | up              | down            | yes                      | yes                                                           | yes                                                          |

| Accession No     | Description                                     | Gene symbol   | Expression in HSPC | Expression change in MEG, fold | Expression change in ERY, fold | Response in MEG | Response in ERY | Bound by heptad in HPC-7 | Bound by heptad in HPC-7 and GATA1 in MEG at overlapping site | Bound by heptad in HPC-7 and TAL1 in MEG at overlapping site |
|------------------|-------------------------------------------------|---------------|--------------------|--------------------------------|--------------------------------|-----------------|-----------------|--------------------------|---------------------------------------------------------------|--------------------------------------------------------------|
| <b>NM_010575</b> | <b>integrin alpha-IIb</b>                       | <b>Itga2b</b> | <b>8.99</b>        | <b>13.15</b>                   | <b>-2.44</b>                   | <b>up</b>       | <b>down</b>     | <b>yes</b>               | <b>yes</b>                                                    | <b>yes</b>                                                   |
| NM_009707        | rho GTPase-activating protein 6 isoform a       | Arhgap6       | 7.22               | 8.43                           | -2.40                          | up              | down            | yes                      | yes                                                           | yes                                                          |
| NM_023635        | ras-related protein Rab-27A                     | Rab27a        | 8.35               | 2.95                           | -5.39                          | up              | down            | yes                      | yes                                                           | yes                                                          |
| NM_001024617     | type II inositol-3,4-bisphosphate 4-phosphatase | Inpp4b        | 6.61               | 8.64                           | -2.22                          | up              | down            | yes                      | yes                                                           | yes                                                          |
| NM_022881        | regulator of G-protein signaling 18             | Rgs18         | 8.87               | 10.85                          | -7.83                          | up              | down            | yes                      | yes                                                           | yes                                                          |
| NM_022029        | neurogranin                                     | Nrgn          | 9.32               | 6.23                           | -3.85                          | up              | down            | yes                      | yes                                                           | yes                                                          |
| <b>NM_019932</b> | <b>platelet factor 4 precursor</b>              | <b>Pf4</b>    | <b>9.92</b>        | <b>11.66</b>                   | <b>-3.32</b>                   | <b>up</b>       | <b>down</b>     | <b>yes</b>               | <b>yes</b>                                                    | <b>yes</b>                                                   |
| NM_016745        | sarcoplasmic/endoplasmic reticulum calcium      | Atp2a3        | 10.07              | 3.90                           | -16.49                         | up              | down            | yes                      | yes                                                           | yes                                                          |
| NM_028133        | egl nine homolog 3                              | Egln3         | 9.77               | 3.14                           | -18.63                         | up              | down            | yes                      | no                                                            | yes                                                          |
| NM_011303        | short-chain dehydrogenase/reductase 3 isoform 1 | Dhrs3         | 9.32               | 4.04                           | -3.65                          | up              | down            | yes                      | yes                                                           | yes                                                          |
| NM_027763        | trem-like transcript 1 protein                  | Trem1         | 8.75               | 10.02                          | -2.16                          | up              | down            | yes                      | no                                                            | no                                                           |
| NM_021278        | thymosin beta-4                                 | Tmsb4x        | 11.10              | 2.79                           | -2.58                          | up              | down            | yes                      | no                                                            | no                                                           |
| NM_018729        | natural killer cell receptor 2B4 precursor      | Cd244         | 7.27               | 2.25                           | -2.33                          | up              | down            | yes                      | no                                                            | no                                                           |
| NM_015811        | regulator of G-protein signaling 1              | Rgs1          | 6.53               | 4.93                           | -3.09                          | up              | down            | yes                      | no                                                            | no                                                           |
| NM_009794        | calpain-2 catalytic subunit                     | Capn2         | 7.93               | 6.70                           | -2.56                          | up              | down            | yes                      | yes                                                           | yes                                                          |
| NM_008851        | membrane-associated phosphatidylinositol        | Pitpm1        | 7.70               | 3.90                           | -2.28                          | up              | down            | yes                      | yes                                                           | yes                                                          |
| NM_008348        | interleukin-10 receptor subunit alpha precursor | Il10ra        | 7.83               | 3.57                           | -4.28                          | up              | down            | yes                      | yes                                                           | yes                                                          |
| NM_007796        | protein CTLA-2-alpha isoform a                  | Ctla2a        | 6.66               | 11.50                          | -4.28                          | up              | down            | yes                      | yes                                                           | yes                                                          |
| NM_010819        | C-type lectin domain family 4 member D isoform  | Clec4d        | 6.16               | 3.84                           | -2.28                          | up              | down            | yes                      | no                                                            | no                                                           |
| NM_010696        | lymphocyte cytosolic protein 2                  | Lcp2          | 9.76               | 3.29                           | -2.95                          | up              | down            | yes                      | no                                                            | yes                                                          |
| NM_008869        | cytosolic phospholipase A2                      | Pla2g4a       | 8.51               | 5.50                           | -3.20                          | up              | down            | yes                      | no                                                            | no                                                           |
| <b>NM_007657</b> | <b>CD9 antigen</b>                              | <b>Cd9</b>    | <b>8.32</b>        | <b>12.01</b>                   | <b>-2.92</b>                   | <b>up</b>       | <b>down</b>     | <b>yes</b>               | <b>no</b>                                                     | <b>no</b>                                                    |
| NM_001113460     | tyrosine-protein kinase Tec isoform a           | Tec           | 7.54               | 8.25                           | -4.19                          | up              | down            | yes                      | no                                                            | no                                                           |
| NM_198411        | inverted formin-2                               | Inf2          | 7.93               | 4.36                           | -2.37                          | up              | down            | yes                      | yes                                                           | yes                                                          |

| Accession No | Description                                     | Gene symbol | Expression in HSPC | Expression change in MEG, fold | Expression change in ERY, fold | Response in MEG | Response in ERY | Bound by heptad in HPC-7 | Bound by heptad in HPC-7 and GATA1 in MEG at overlapping site | Bound by heptad in HPC-7 and TAL1 in MEG at overlapping site |
|--------------|-------------------------------------------------|-------------|--------------------|--------------------------------|--------------------------------|-----------------|-----------------|--------------------------|---------------------------------------------------------------|--------------------------------------------------------------|
| NM_177855    | mediator of RNA polymerase II transcription     | Med12l      | 7.36               | 9.16                           | -2.12                          | up              | down            | yes                      | yes                                                           | yes                                                          |
| NM_172468    | sorting nexin-30                                | Snx30       | 7.64               | 2.20                           | -2.22                          | up              | down            | yes                      | yes                                                           | yes                                                          |
| NM_019549    | pleckstrin                                      | Plek        | 9.23               | 12.78                          | -3.53                          | up              | down            | yes                      | yes                                                           | yes                                                          |
| NM_011101    | protein kinase C alpha type                     | Prkca       | 7.28               | 15.34                          | -2.23                          | up              | down            | yes                      | yes                                                           | yes                                                          |
| NM_010789    | homeobox protein Meis1 isoform A                | Meis1       | 8.97               | 3.49                           | -6.33                          | up              | down            | yes                      | yes                                                           | yes                                                          |
| NM_008139    | guanine nucleotide-binding protein G(q) subunit | Gnaq        | 8.48               | 5.30                           | -2.87                          | up              | down            | yes                      | yes                                                           | yes                                                          |
| NM_001033399 | glucose-fructose oxidoreductase                 | Gfod1       | 7.10               | 3.14                           | -2.04                          | up              | down            | yes                      | yes                                                           | yes                                                          |
| NM_001081298 | latrophilin-2                                   | Lphn2       | 6.95               | 4.09                           | 1.84                           | up              |                 | yes                      | no                                                            | yes                                                          |
| NM_001001491 | tropomyosin alpha-4 chain                       | Tpm4        | 9.99               | 6.54                           | -1.78                          | up              |                 | yes                      | no                                                            | yes                                                          |
| NM_175437    | gamma-secretase-activating protein              | Pion        | 5.98               | 9.04                           | -1.36                          | up              |                 | yes                      | no                                                            | no                                                           |
| NM_025706    | TBC1 domain family member 15                    | Tbc1d15     | 8.14               | 3.53                           | 2.52                           | up              |                 | yes                      | no                                                            | no                                                           |
| NM_172647    | junctional adhesion molecule A precursor        | F11r        | 6.33               | 20.26                          | 1.23                           | up              |                 | yes                      | no                                                            | yes                                                          |
| NM_146145    | tyrosine-protein kinase JAK1                    | Jak1        | 9.49               | 3.09                           | 2.17                           | up              |                 | yes                      | no                                                            | no                                                           |
| NM_133885    | oxysterol-binding protein-related protein 9     | Osbp19      | 8.86               | 3.21                           | 1.85                           | up              |                 | yes                      | no                                                            | yes                                                          |
| NM_009124    | ataxin-1                                        | Atxn1       | 7.52               | 3.59                           | -1.85                          | up              |                 | yes                      | no                                                            | no                                                           |
| NM_033563    | Krueppel-like factor 7                          | Klf7        | 6.74               | 10.26                          | 1.28                           | up              |                 | yes                      | no                                                            | no                                                           |
| NM_013489    | SLAM family member 5 precursor                  | Cd84        | 6.35               | 8.92                           | -1.46                          | up              |                 | yes                      | no                                                            | no                                                           |
| NM_011866    | cAMP and cAMP-inhibited cGMP 3',5'-cyclic       | Pde10a      | 6.37               | 8.18                           | -1.39                          | up              |                 | yes                      | no                                                            | no                                                           |
| NM_011602    | talin-1                                         | Tln1        | 10.93              | 2.11                           | -1.32                          | up              |                 | yes                      | no                                                            | no                                                           |
| NM_011416    | probable global transcription activator SNF2L2  | Smarca2     | 7.09               | 3.94                           | -2.04                          | up              |                 | yes                      | no                                                            | no                                                           |
| NM_010879    | non-catalytic region of tyrosine kinase adaptor | Nck2        | 8.60               | 5.89                           | 1.81                           | up              |                 | yes                      | yes                                                           | yes                                                          |
| NM_011203    | tyrosine-protein phosphatase non-receptor type  | Ptpn12      | 8.28               | 5.99                           | 1.81                           | up              |                 | yes                      | no                                                            | yes                                                          |
| NM_011145    | peroxisome proliferator-activated receptor      | Ppard       | 8.63               | 3.37                           | 1.95                           | up              |                 | yes                      | no                                                            | no                                                           |
| NR_000002    | small nucleolar RNA, C/D box 32A                | Snord32a    | 9.96               | 2.04                           | 1.85                           | up              |                 | yes                      | yes                                                           | yes                                                          |
| NM_172753    | chondroitin sulfate                             | Csgalnact1  | 6.14               | 3.86                           | -1.69                          | up              |                 | yes                      | yes                                                           | yes                                                          |

| Accession No     | Description                                           | Gene symbol   | Expression in HSPC | Expression change in MEG, fold | Expression change in ERY, fold | Response in MEG | Response in ERY | Bound by heptad in HPC-7 | Bound by heptad in HPC-7 and GATA1 in MEG at overlapping site | Bound by heptad in HPC-7 and TAL1 in MEG at overlapping site |
|------------------|-------------------------------------------------------|---------------|--------------------|--------------------------------|--------------------------------|-----------------|-----------------|--------------------------|---------------------------------------------------------------|--------------------------------------------------------------|
| NM_010266        | guanine deaminase                                     | Gda           | 6.05               | 12.11                          | -1.67                          | up              |                 | yes                      | no                                                            | no                                                           |
| NM_008913        | serine/threonine-protein phosphatase 2B               | Ppp3ca        | 8.49               | 2.91                           | -1.52                          | up              |                 | yes                      | no                                                            | no                                                           |
| NM_134133        | putative small membrane protein NID67                 | 2010002N04Rik | 9.43               | 5.88                           | 1.22                           | up              |                 | yes                      | yes                                                           | yes                                                          |
| NM_029653        | death-associated protein kinase 1                     | Dapk1         | 8.14               | 2.63                           | -1.24                          | up              |                 | yes                      | yes                                                           | yes                                                          |
| NM_176860        | ubiquitin-associated and SH3 domain-containing        | Ubash3b       | 7.48               | 13.79                          | -1.89                          | up              |                 | yes                      | yes                                                           | yes                                                          |
| NM_175353        | exocyst complex component 6                           | Exoc6         | 8.30               | 5.00                           | 2.90                           | up              |                 | yes                      | yes                                                           | yes                                                          |
| NM_011365        | intersectin-2 isoform 2                               | Itn2          | 7.76               | 3.30                           | 1.79                           | up              |                 | yes                      | yes                                                           | yes                                                          |
| NM_133732        | ester hydrolase C11orf54 homolog                      | 4931406C07Rik | 7.98               | 2.67                           | -1.97                          | up              |                 | yes                      | yes                                                           | yes                                                          |
| NM_001001488     | probable phospholipid-transporting ATPase IC          | Atp8b1        | 5.19               | 13.54                          | 1.44                           | up              |                 | yes                      | yes                                                           | yes                                                          |
| NM_028643        | EF-hand domain-containing family member A1            | Efha1         | 8.45               | 2.56                           | 1.74                           | up              |                 | yes                      | yes                                                           | yes                                                          |
| <b>NM_023785</b> | <b>platelet basic protein</b>                         | <b>Pbbp</b>   | <b>10.63</b>       | <b>7.25</b>                    | <b>-2.12</b>                   | <b>up</b>       |                 | <b>yes</b>               | <b>yes</b>                                                    | <b>yes</b>                                                   |
| NM_019919        | latent-transforming growth factor beta-binding        | Ltbp1         | 7.25               | 14.75                          | -1.60                          | up              |                 | yes                      | yes                                                           | yes                                                          |
| NM_018811        | abhydrolase domain-containing protein 2               | Abhd2         | 9.10               | 2.25                           | 1.58                           | up              |                 | yes                      | yes                                                           | no                                                           |
| NM_011682        | utrophin                                              | Utrn          | 7.22               | 4.27                           | -1.86                          | up              |                 | yes                      | yes                                                           | yes                                                          |
| NM_011347        | P-selectin                                            | <b>Selp</b>   | 6.20               | 29.49                          | -1.69                          | up              |                 | yes                      | yes                                                           | yes                                                          |
| NM_011308        | nuclear receptor corepressor 1                        | Ncor1         | 8.98               | 4.34                           | 2.48                           | up              |                 | yes                      | yes                                                           | yes                                                          |
| <b>NM_010326</b> | <b>platelet glycoprotein Ib alpha chain precursor</b> | <b>Gp1ba</b>  | <b>6.56</b>        | <b>17.26</b>                   | <b>-1.69</b>                   | <b>up</b>       |                 | <b>yes</b>               | <b>yes</b>                                                    | <b>yes</b>                                                   |
| NM_001083810     | proline-rich protein 5-like                           | Prr5l         | 5.26               | 14.02                          | -1.42                          | up              |                 | yes                      | yes                                                           | yes                                                          |
| NM_001009935     | thioredoxin-interacting protein isoform 1             | Txnip         | 10.50              | 2.11                           | -1.66                          | up              |                 | yes                      | no                                                            | yes                                                          |
| NM_198013        | CUE domain-containing protein 1 isoform 1             | Cuedc1        | 6.72               | 11.19                          | -1.59                          | up              |                 | yes                      | yes                                                           | yes                                                          |
| NM_016780        | integrin beta-3 precursor                             | Irgb3         | 8.48               | 22.38                          | -2.39                          | up              |                 | yes                      | yes                                                           | yes                                                          |
| NM_001082553     | ras-related protein Rab-27B                           | Rab27b        | 6.50               | 41.77                          | -1.43                          | up              |                 | yes                      | yes                                                           | yes                                                          |
| NM_001033259     | coiled-coil domain-containing protein 109A            | Ccdc109a      | 8.49               | 4.21                           | -1.37                          | up              |                 | yes                      | yes                                                           | yes                                                          |

**Supplementary Table 2. Developmental priming of ERY genes by the GATA2/LYL1/ TAL1/FLI1/ERG/RUNX1/LMO2 transcription factor heptad.** The table shows developmentally induced ERY genes that are occupied by the heptad in HPC-7 cells (Wilson et al, 2010) and by GATA1 in maturing ERY cells, respectively, at overlapping OSs. The directionality of the developmental response in the alternate lineage is also shown along with the fold change of gene expression. Blank values indicate indeterminable response (fold change between 1.2 and 2, or FDR > 0.05). Common MEG-ERY primed genes are *italicized*.

| Accession No | Description                                             | Gene symbol       | Expression in HSPC | Expression change in MEG, fold | Expression change in ERY, fold | Response in MEG | Response in ERY | Bound by heptad in HPC-7 | Bound by heptad in HPC-7 and GATA1 in MEG at overlapping site | Bound by heptad in HPC-7 and TAL1 in MEG at overlapping site |
|--------------|---------------------------------------------------------|-------------------|--------------------|--------------------------------|--------------------------------|-----------------|-----------------|--------------------------|---------------------------------------------------------------|--------------------------------------------------------------|
| NM_175367    | <i>stonin-2</i>                                         | <i>Ston2</i>      | 7.86               | 8.49                           | 3.66                           | up              | up              | yes                      | no                                                            | no                                                           |
| NM_018784    | <i>type 2 lactosamine alpha-2,3-sialyltransferase</i>   | <i>St3gal6</i>    | 7.13               | 8.39                           | 6.24                           | up              | up              | yes                      | no                                                            | no                                                           |
| NM_010433    | <i>homeodomain-interacting protein kinase 2 isoform</i> | <i>Hipk2</i>      | 9.36               | 3.66                           | 6.74                           | up              | up              | yes                      | no                                                            | no                                                           |
| NM_133167    | <i>beta-parvin</i>                                      | <i>Parvb</i>      | 7.86               | 20.29                          | 3.75                           | up              | up              | yes                      | no                                                            | no                                                           |
| NM_010587    | <i>intersectin-1 isoform 1</i>                          | <i>Itsn1</i>      | 6.42               | 3.73                           | 7.12                           | up              | up              | yes                      | no                                                            | no                                                           |
| NM_138953    | <i>RNA polymerase II elongation factor ELL2</i>         | <i>Ell2</i>       | 6.87               | 6.52                           | 28.53                          | up              | up              | yes                      | no                                                            | no                                                           |
| NM_028759    | <i>DDB1- and CUL4-associated factor 6</i>               | <i>Dcaf6</i>      | 7.28               | 2.91                           | 5.97                           | up              | up              | yes                      | no                                                            | no                                                           |
| NM_013862    | <i>rab GTPase-activating protein 1-like isoform a</i>   | <i>Rabgap1l</i>   | 6.52               | 6.33                           | 5.93                           | up              | up              | yes                      | no                                                            | no                                                           |
| NM_010026    | <i>arf-GAP with SH3 domain, ANK repeat and PH</i>       | <i>Asap1</i>      | 8.77               | 4.49                           | 4.68                           | up              | up              | yes                      | no                                                            | no                                                           |
| NM_001081232 | <i>hypothetical protein LOC320661</i>                   | <i>D5Ertd579e</i> | 5.55               | 4.52                           | 12.84                          | up              | up              | yes                      | no                                                            | no                                                           |
| NM_001081308 | <i>serine/threonine-protein kinase TAO3</i>             | <i>Taok3</i>      | 8.29               | 3.91                           | 2.43                           | up              | up              | yes                      | no                                                            | no                                                           |
| NM_026148    | <i>LIM and senescent cell antigen-like-containing</i>   | <i>Lims1</i>      | 8.49               | 9.02                           | 2.87                           | up              | up              | yes                      | no                                                            | no                                                           |
| NM_023605    | <i>F-box only protein 9 isoform 1</i>                   | <i>Fbxo9</i>      | 7.63               | 3.15                           | 5.66                           | up              | up              | yes                      | no                                                            | no                                                           |
| NM_172473    | <i>E3 ubiquitin-protein ligase HACE1</i>                | <i>Hace1</i>      | 7.09               | 3.13                           | 10.74                          | up              | up              | yes                      | yes                                                           | yes                                                          |
| NM_145541    | <i>ras-related protein Rap-1A precursor</i>             | <i>Rap1a</i>      | 8.89               | 8.22                           | 4.93                           | up              | up              | yes                      | yes                                                           | yes                                                          |
| NM_026735    | <i>mps one binder kinase activator-like 1A</i>          | <i>Mobk11a</i>    | 7.84               | 7.85                           | 3.76                           | up              | up              | yes                      | yes                                                           | no                                                           |
| NM_026921    | <i>iron-sulfur cluster assembly 1 homolog,</i>          | <i>Isca1</i>      | 8.11               | 3.07                           | 7.84                           | up              | up              | yes                      | yes                                                           | yes                                                          |

| Accession No | Description                                                                                           | Gene symbol     | Expression in HSPC | Expression change in MEG, fold | Expression change in ERY, fold | Response in MEG | Response in ERY | Bound by heptad in HPC-7 | Bound by heptad in HPC-7 and GATA1 in MEG at overlapping site | Bound by heptad in HPC-7 and TAL1 in MEG at overlapping site |
|--------------|-------------------------------------------------------------------------------------------------------|-----------------|--------------------|--------------------------------|--------------------------------|-----------------|-----------------|--------------------------|---------------------------------------------------------------|--------------------------------------------------------------|
| NM_146025    | <i>sterile alpha motif domain-containing protein 14</i>                                               | <i>Samd14</i>   | 8.49               | 4.67                           | 5.12                           | up              | up              | yes                      | yes                                                           | no                                                           |
| NM_001164557 | <i>PDZK1-interacting protein 1 isoform 1</i>                                                          | <i>Pdzk1ip1</i> | 7.27               | 4.05                           | 4.38                           | up              | up              | yes                      | yes                                                           | yes                                                          |
| NM_153538    | <i>terminal uridylyltransferase 7</i>                                                                 | <i>Zcchc6</i>   | 7.87               | 3.23                           | 8.58                           | up              | up              | yes                      | yes                                                           | yes                                                          |
| NM_145486    | <i>E3 ubiquitin-protein ligase MARCH2</i>                                                             | <i>40604</i>    | 9.18               | 3.27                           | 6.85                           | up              | up              | yes                      | yes                                                           | yes                                                          |
| NM_028011    | <i>TOM1-like protein 1</i>                                                                            | <i>Tom111</i>   | 7.69               | 6.55                           | 7.48                           | up              | up              | yes                      | yes                                                           | yes                                                          |
| NM_026004    | <i>cytosolic 5'-nucleotidase 3</i>                                                                    | <i>Nt5c3</i>    | 7.03               | 9.18                           | 11.47                          | up              | up              | yes                      | yes                                                           | no                                                           |
| NM_001080977 | <i>round spermatid basic protein 1-like</i>                                                           | <i>Rsb1l</i>    | 7.65               | 7.35                           | 3.84                           | up              | up              | yes                      | yes                                                           | yes                                                          |
| NM_021461    | <i>MAP kinase-interacting serine/threonine-protein V-type proton ATPase 116 kDa subunit a isoform</i> | <i>Mknk1</i>    | 8.99               | 5.74                           | 2.31                           | up              | up              | yes                      | yes                                                           | yes                                                          |
| NM_016920    | <i>cAMP-dependent protein kinase type II-beta</i>                                                     | <i>Atp6v0a1</i> | 8.60               | 6.08                           | 7.31                           | up              | up              | yes                      | yes                                                           | yes                                                          |
| NM_011158    | <i>CMP-N-acetylneuramate-beta-galactosamide-phosphatidylcholine:ceramide</i>                          | <i>Prkar2b</i>  | 8.66               | 12.05                          | 5.61                           | up              | up              | yes                      | yes                                                           | no                                                           |
| NM_009177    | <i>ubiquitin-conjugating enzyme E2 O</i>                                                              | <i>St3gal1</i>  | 9.68               | 2.77                           | 2.35                           | up              | up              | yes                      | yes                                                           | yes                                                          |
| NM_001168525 | <i>major prion protein precursor</i>                                                                  | <i>Sgms1</i>    | 8.04               | 3.87                           | 3.11                           | up              | up              | yes                      | yes                                                           | yes                                                          |
| NM_173755    | <i>DENN domain-containing protein 2C</i>                                                              | <i>Ube2o</i>    | 8.52               | 4.85                           | 10.65                          | up              | up              | yes                      | yes                                                           | yes                                                          |
| NM_011170    | <i>histocompatibility 2, T region locus 24</i>                                                        | <i>Prnp</i>     | 5.58               | 3.00                           | 8.21                           | up              | up              | yes                      | yes                                                           | yes                                                          |
| NM_009179    | <i>ubiquitin-like modifier-activating enzyme 7</i>                                                    | <i>St3gal2</i>  | 7.79               | 2.74                           | 3.97                           | up              | up              | yes                      | yes                                                           | yes                                                          |
| NM_008207    | <i>leucine-rich repeat-containing protein 8B</i>                                                      | <i>H2-T24</i>   | 6.79               | 6.76                           | 7.21                           | up              | up              | yes                      | yes                                                           | yes                                                          |
| NM_177857    | <i>major facilitator superfamily domain-containing</i>                                                | <i>Dennd2c</i>  | 6.27               | 12.94                          | 14.80                          | up              | up              | yes                      | yes                                                           | yes                                                          |
| NM_023738    | <i>probable palmitoyltransferase ZDHHC14</i>                                                          | <i>Uba7</i>     | 7.63               | 4.14                           | 2.92                           | up              | up              | yes                      | yes                                                           | yes                                                          |
| NM_001033550 | <i>tubulin-specific chaperone cofactor E-like</i>                                                     | <i>Lrrc8b</i>   | 9.15               | 3.42                           | 3.47                           | up              | up              | yes                      | yes                                                           | yes                                                          |
| NM_001033488 | <i>cation-independent mannose-6-phosphate receptor</i>                                                | <i>Mfsd2b</i>   | 9.27               | 4.22                           | 3.08                           | up              | up              | yes                      | yes                                                           | yes                                                          |
| NM_146073    | <i>transmembrane protein 86B</i>                                                                      | <i>Zdhhc14</i>  | 7.15               | -1.13                          | 7.18                           | nch             | up              | yes                      | no                                                            | no                                                           |
| NM_173038    | <i>transmembrane protein 131</i>                                                                      | <i>Tbcel</i>    | 8.27               | 1.17                           | 5.26                           | nch             | up              | yes                      | yes                                                           | no                                                           |
| NM_010515    |                                                                                                       | <i>Igf2r</i>    | 7.55               | 1.10                           | 2.88                           | nch             | up              | yes                      | no                                                            | no                                                           |
| NM_023440    |                                                                                                       | <i>Tmem86b</i>  | 8.09               | -1.04                          | 4.32                           | nch             | up              | yes                      | yes                                                           | yes                                                          |
| NM_018872    |                                                                                                       | <i>Tmem131</i>  | 9.11               | 1.19                           | 4.15                           | nch             | up              | yes                      | yes                                                           | yes                                                          |



| Accession No | Description                                      | Gene symbol       | Expression in HSPC | Expression change in MEG, fold | Expression change in ERY, fold | Response in MEG | Response in ERY | Bound by heptad in HPC-7 | Bound by heptad in HPC-7 and GATA1 in MEG at overlapping site | Bound by heptad in HPC-7 and TAL1 in MEG at overlapping site |
|--------------|--------------------------------------------------|-------------------|--------------------|--------------------------------|--------------------------------|-----------------|-----------------|--------------------------|---------------------------------------------------------------|--------------------------------------------------------------|
| NM_145508    | dual specificity                                 | Dyrk3             | 8.00               | -1.05                          | 3.24                           | nch             | up              | yes                      | yes                                                           | yes                                                          |
| NM_018776    | cytokine receptor-like factor 3                  | Crif3             | 9.31               | -1.04                          | 2.53                           | nch             | up              | yes                      | yes                                                           | yes                                                          |
| NM_001114332 | monocarboxylate transporter 10 isoform 1         | Slc16a10          | 8.94               | -1.08                          | 6.21                           | nch             | up              | yes                      | yes                                                           | yes                                                          |
| NM_001029856 | ATPase family AAA domain-containing protein 5    | Atad5             | 6.93               | -1.06                          | 5.73                           | nch             | up              | yes                      | yes                                                           | yes                                                          |
| NM_013711    | thioredoxin reductase 2, mitochondrial           | Txnrd2            | 8.31               | -2.52                          | 5.02                           | down            | up              | yes                      | no                                                            | no                                                           |
| NM_033569    | metal transporter CNNM2 isoform a                | Cnnm2             | 7.76               | -2.02                          | 2.39                           | down            | up              | yes                      | no                                                            | no                                                           |
| NM_008256    | hydroxymethylglutaryl-CoA synthase,              | Hmgcs2            | 7.66               | -3.26                          | 2.41                           | down            | up              | yes                      | no                                                            | no                                                           |
| NM_172543    | RIKEN cDNA 5730593F17                            | Fam117a           | 9.77               | -3.26                          | 2.69                           | down            | up              | yes                      | yes                                                           | yes                                                          |
| NM_001085409 | metalloreductase STEAP3                          | Steap3            | 8.91               | -2.92                          | 4.26                           | down            | up              | yes                      | yes                                                           | no                                                           |
| NM_172475    | FERM domain-containing protein 4A isoform 1      | Frmd4a            | 7.36               | 1.68                           | 3.86                           |                 | up              | yes                      | no                                                            | no                                                           |
| NM_008845    | phosphatidylinositol-5-phosphate 4-kinase type-2 | Pip4k2a           | 9.90               | 2.49                           | 2.72                           |                 | up              | yes                      | no                                                            | no                                                           |
| NM_010019    | death-associated protein kinase 2                | Dapk2             | 6.06               | -1.26                          | 12.75                          |                 | up              | yes                      | no                                                            | no                                                           |
| NM_027868    | solute carrier family 41 member 3 isoform 1      | Slc41a3           | 9.44               | -1.88                          | 2.52                           |                 | up              | yes                      | no                                                            | no                                                           |
| NM_007964    | ecotropic viral integration site 5 protein       | Evi5              | 6.18               | -1.49                          | 11.12                          |                 | up              | yes                      | no                                                            | no                                                           |
| NM_007550    | Bloom syndrome protein homolog isoform 1         | Blm               | 8.33               | 2.18                           | 5.10                           |                 | up              | yes                      | no                                                            | no                                                           |
| NM_173402    | regulator of G-protein signalling 12 isoform A   | Rgs12             | 7.71               | 1.43                           | 2.29                           |                 | up              | yes                      | no                                                            | no                                                           |
| NM_001081636 | G1/S-specific cyclin-D3                          | Ccnd3             | 10.30              | 1.94                           | 2.08                           |                 | up              | yes                      | no                                                            | no                                                           |
| NM_001001184 | coiled-coil domain-containing protein 111        | Ccdc111           | 7.36               | 2.18                           | 2.84                           |                 | up              | yes                      | yes                                                           | yes                                                          |
| NM_028419    | glutaredoxin-related protein 5, mitochondrial    | Glr5              | 10.82              | -1.31                          | 3.11                           |                 | up              | yes                      | yes                                                           | yes                                                          |
| NM_013454    | ATP-binding cassette sub-family A member 1       | Abca1             | 7.68               | 1.96                           | 2.13                           |                 | up              | yes                      | no                                                            | no                                                           |
| NM_177391    | hypothetical protein LOC338368                   | Fam109b           | 7.45               | -1.79                          | 3.15                           |                 | up              | yes                      | yes                                                           | yes                                                          |
| NM_033623    | DCN1-like protein 1                              | Dcun1d1           | 7.80               | 3.10                           | 5.05                           |                 | up              | yes                      | yes                                                           | yes                                                          |
| NM_029081    | hypothetical protein LOC74741 isoform 1          | 573041910<br>9Rik | 8.51               | 1.34                           | 3.28                           |                 | up              | yes                      | yes                                                           | yes                                                          |
| NM_028932    | ELL-associated factor 1                          | Eaf1              | 8.71               | -1.29                          | 2.55                           |                 | up              | yes                      | yes                                                           | yes                                                          |
| NM_177733    | transcription factor E2F2                        | E2f2              | 7.52               | -1.26                          | 16.07                          |                 | up              | yes                      | yes                                                           | yes                                                          |

| Accession No | Description                                  | Gene symbol | Expression in HSPC | Expression change in MEG, fold | Expression change in ERY, fold | Response in MEG | Response in ERY | Bound by heptad in HPC-7 | Bound by heptad in HPC-7 and GATA1 in MEG at overlapping site | Bound by heptad in HPC-7 and TAL1 in MEG at overlapping site |
|--------------|----------------------------------------------|-------------|--------------------|--------------------------------|--------------------------------|-----------------|-----------------|--------------------------|---------------------------------------------------------------|--------------------------------------------------------------|
| NM_134021    | pyridoxine-5'-phosphate oxidase              | Pnpo        | 9.47               | -2.12                          | 5.18                           |                 | up              | yes                      | yes                                                           | yes                                                          |
| NM_019744    | nuclear receptor coactivator 4               | Ncoa4       | 9.94               | 2.15                           | 5.06                           |                 | up              | yes                      | yes                                                           | yes                                                          |
| NM_009764    | breast cancer type 1 susceptibility protein  | Brca1       | 7.37               | -1.49                          | 5.56                           |                 | up              | yes                      | yes                                                           | yes                                                          |
| NM_027872    | solute carrier family 46 member 3 precursor  | Slc46a3     | 7.43               | 1.46                           | 4.06                           |                 | up              | yes                      | yes                                                           | yes                                                          |
| NM_007970    | histone-lysine N-methyltransferase EZH1      | Ezh1        | 8.26               | 1.88                           | 2.10                           |                 | up              | yes                      | yes                                                           | yes                                                          |
| NM_001033988 | nuclear receptor coactivator 4               | Ncoa4       | 9.86               | 2.10                           | 4.87                           |                 | up              | yes                      | yes                                                           | yes                                                          |
| NM_020332    | progressive ankylosis protein                | Ank         | 8.03               | 2.01                           | 4.50                           |                 | up              | yes                      | yes                                                           | yes                                                          |
| NM_010576    | integrin alpha-4                             | Itga4       | 9.81               | -1.74                          | 3.43                           |                 | up              | yes                      | yes                                                           | yes                                                          |
| NM_029332    | A kinase (PRKA) anchor protein 13            | Akap13      | 8.13               | 1.43                           | 2.23                           |                 | up              | yes                      | yes                                                           | yes                                                          |
| NM_001033301 | FH2 domain-containing protein 1              | Fhdc1       | 5.13               | 1.14                           | 70.24                          |                 | up              | yes                      | yes                                                           | no                                                           |
| NM_009569    | zinc finger protein ZFPM1                    | Zfpm1       | 10.39              | 1.57                           | 2.27                           |                 | up              | yes                      | yes                                                           | yes                                                          |
| NM_008654    | protein phosphatase 1 regulatory subunit 15A | Ppp1r15a    | 8.14               | 1.81                           | 6.90                           |                 | up              | yes                      | yes                                                           | yes                                                          |
